42 Speech perception is fundamentally important for human communication. While speech signals  
43 are often embedded in complex sound mixtures that can interfere with speech perception via  
44 energetic and informational masking, the auditory system is remarkably adept at utilizing  
45 attentional mechanisms to suppress distractor information and enhance representations of the  
46 target speech (e.g., Ding and Simon, 2012a; Mesgarani and Chang, 2012; O’Sullivan et al.,  
47 2019). However, the robustness of speech perception, particularly in the presence of noise, is  
48 vulnerable to deterioration through both noise-induced and age-related hearing loss (Dubno et  
49 al., 1984; Helfer and Wilber, 1990; Fogerty et al., 2015, 2020) as well as age-related cognitive  
50 decline (van Rooij and Plomp, 1990; Akeroyd, 2008; Dryden et al., 2017). Additionally, a small  
51 but significant portion of the population experiences speech-in-noise (SIN) perception  
52 difficulties, without exhibiting clinical hearing loss (Saunders, 1989; Zhao and Stephens, 2007;  
53 Tremblay et al., 2015). Together, these SIN perception difficulties can lead to significant  
54 impairment in quality of life (Dalton et al., 2003; Chia et al., 2007), and in older adults they may  
55 result in increased social isolation (Chia et al., 2007; Mick et al., 2014; Pronk et al., 2014),  
56 potentially exacerbating loss of cognitive function (Loughrey et al., 2018; Ray et al., 2018).

57 Although subjective SIN perception difficulties are relatively common in older  
58 individuals, objective tests for quantifying these deficits, such as identification of words or  
59 sentences in noise (e.g., QuickSin; Killion et al., 2004), often do not strongly correlate with the  
60 degree of subjective deficit (Phatak et al., 2018), particularly in cases with little-to-no clinical  
61 hearing loss. Smith and colleagues (2019) recently reported that only 8% of their sample of 194  
62 listeners exhibited deficits in objective SIN tasks, while 42% of listeners indicated experiencing  
63 subjective SIN perception difficulties. A likely reason for this mismatch is that objective speech  
64 perception tests do not accurately reflect real world scenarios where SIN difficulties arise. For  
65 example, while existing tests generally require identification of isolated words or sentences  
66 embedded in noise (e.g., speech-shaped noise or a competing talker), real world speech  
67 perception often requires real-time comprehension of multi-sentence expressions, embedded  
68 in a reverberant environment, in the presence of multiple competing speakers at different  
69 spatial positions. In these scenarios, listeners who need to expend additional time and cognitive  
70 resources to identify the meaning of the incoming speech may “fall behind” in comprehension  
71 of later parts of the utterance. Moreover, even if the listener can correctly piece together the  
72 meaning of the utterance, their subjective confidence may be diminished, potentially “blurring”  
73 the predictive processes thought to facilitate perception of upcoming speech (Pickering and  
74 Gambi, 2018). As such, behavioral measures that more accurately reflect subjective SIN  
75 perception difficulties may require utilization of more realistic, narrative stimuli, and focus on  
76 quantifying comprehension, as opposed to simple word or sentence identification (e.g., Xia et  
77 al., 2017).

78 While development of behavioral paradigms focusing on characterizing SIN perception  
79 difficulties is an important goal, a complementary and potentially more sensitive approach to  
80 quantifying these deficits may be provided by neural measures of continuous-speech tracking.  
81 In recent years, non-invasive methodologies for measurement of neural representations of  
82 continuous speech in humans have become increasingly popular (Lalor and Foxe, 2010; Crosse

83 et al., 2016), particularly in application to young normal-hearing (YNH) populations. One  
84 important result of this work has been the demonstration of profound attentional modulation  
85 of speech whereby temporal dynamics of neural responses to attended and ignored speech  
86 differ considerably, both in representation of lower-level features such as the speech envelope  
87 (Ding and Simon, 2012; Power et al., 2012; Kong et al., 2014; Fiedler et al., 2019), and higher-  
88 level features related to lexical and semantic content of speech (Brodbeck et al., 2018;  
89 Broderick et al., 2018). Indeed, while lower-level features produce robust responses even when  
90 speech is ignored, features related to linguistic representations only show robust responses for  
91 attended speech, suggesting that they are tightly linked with speech comprehension.  
92 Responses to higher-level features may therefore be particularly sensitive to SIN perception  
93 difficulties, which are likely associated with impaired comprehension performance. In fact, SIN  
94 perception difficulties could potentially manifest themselves not only in terms of poorer  
95 tracking of higher-level features in attended speech, but also in increased tracking of features in  
96 ignored speech, when facing difficulties with suppression of distractor information.

97 Changes in neural processing of continuous speech in aging populations, compared to  
98 young adults, are relatively poorly understood. Several studies have utilized magneto- and  
99 electroencephalography (M/EEG) to address this question. Studies comparing envelope-related  
100 cortical responses have revealed a pattern of amplified envelope representations in older  
101 populations (Presacco et al., 2016; Decruy et al., 2019; Zan et al., 2020), potentially reflecting  
102 changes in the utilization of cognitive resources during speech comprehension. More recently,  
103 Broderick et al. (2020) compared higher-level representations of speech in younger and older  
104 populations. They estimated EEG responses to 5-gram surprisal, reflecting the predictability of  
105 words given the preceding sequence of four words, as well as semantic dissimilarity, reflecting  
106 the contribution of each word to the semantic content of a sentence. While younger listeners  
107 showed strong responses to both of these features, older adults exhibited a delayed surprisal  
108 response and a near-absent response to semantic dissimilarity. These findings demonstrate  
109 that representations of higher-level features of speech may indeed reveal robust effects of age.  
110 However, because Broderick et al. (2020) did not report behavioral measures related to speech  
111 comprehension, nor measures of subjective speech perception difficulties among their  
112 participants, it is unclear whether these metrics would correlate with the reported EEG-based  
113 findings. Moreover, participants in that study were presented with clear speech without any  
114 distractors (e.g., competing speakers), making it unclear how speech representations differ in  
115 complex listening scenarios where speech perception difficulties are most commonly reported.

116 The goal of this study was to compare higher-level neural representations of two-talker  
117 speech mixtures between younger and older adults, and to explore how these measures relate  
118 to comprehension performance and self-reported SIN perception difficulties. In particular, we  
119 examined representations related to word dissimilarity relative to short-term preceding  
120 context, lexical surprisal based on multi-sentence context, and word-level audibility. We chose  
121 to pursue this paradigm for several reasons. First, a multi-talker paradigm was chosen because  
122 subjective SIN perception difficulties commonly arise in aging listeners in the context of  
123 competing speech. If age-related changes in neural representations are confirmed, then these

124 neural signatures could potentially be further explored as a candidate objective correlate for  
125 subjective SIN difficulties. Second, we chose to characterize responses to word-level features  
126 linked to meaning and lexical predictability because existing evidence indicates that responses  
127 to higher-level features are tightly linked to speech comprehension (Broderick et al., 2018). As  
128 such, we anticipated that responses to these features are more likely to exhibit differences as a  
129 function of age and SIN perception difficulties. Although neural representations reflecting the  
130 end-goal of speech perception may allow for only limited inference about the underlying causes  
131 of SIN perception difficulties, which can range from peripheral changes in acoustic  
132 representations to more central changes in cognitive processes, these representations may  
133 offer increased sensitivity due to capturing the combined effects of the various etiologies  
134 underlying the deficit.

135

## 136 **2. Materials and Methods**

137

### 138 **2.1 Participants**

139

140 In total, 45 adult volunteers completed the experiment, and data from 41 participants were  
141 used due to a methodological change implemented early in data collection. The participant  
142 pool was divided into two groups, younger adults (YA) and older adults (OA), with participants  
143 who were 18-39 years included in the former, and participants who were 40-70 years included  
144 in the latter. The YA group consisted of 20 participants (6 male, 14 female; mean  $\pm$  s.d. age:  
145  $29.40 \pm 6.40$  years), while the OA group included 21 participants (9 male, 12 female; mean  $\pm$   
146 s.d. age:  $53.48 \pm 8.68$  years). Participants were recruited via email advertisement from a pool of  
147 students, staff, and alumni of the University of Minnesota. All participants provided informed  
148 written consent and received either course credit or monetary compensation for their  
149 participation. The procedures were approved by the Institutional Review Board of the  
150 University of Minnesota.

151

### 152 **2.2 Audiometry**

153

154 An air-conduction audiogram was measured in each ear for each participant prior to beginning  
155 the EEG procedures. Detection thresholds were measured at octave frequencies in the 250 –  
156 8000 Hz range, and frequencies for which thresholds exceeded 20 dB HL were deemed to be  
157 affected by hearing loss (HL). This procedure resulted in the detection of 2 participants in the  
158 YA group, and 16 participants in the OA group as having mild-to-moderate high-frequency HL.  
159 The skewed distribution of HL towards the older population was expected, as peripheral  
160 frequency sensitivity naturally diminishes with age (see reviews by Huang and Tang, 2010;  
161 Yamasoba et al., 2013).

162

163 For participants with any hearing loss, all experimental audio materials were amplified in the  
164 frequency regions of hearing loss, as described in section 2.4 below. Under these conditions, we  
165 observed no association between task performance and high-frequency hearing loss.

166

### 167 **2.3 Modified SSQ questionnaire**

168

169 Prior to the EEG procedures, all participants completed a modified version of a subset of  
170 Speech, Spatial and Qualities of Hearing Scale (SSQ<sub>m</sub>). The original version of SSQ (Gatehouse  
171 and Noble, 2004) was designed to measure subjective hearing challenges faced by listeners in  
172 various situations of daily life. In our version, we specifically probed participants about  
173 difficulties with and frustrations related to hearing speech in noisy situations, such as cafes and  
174 social gatherings. Each of the 14 items was presented on a computer screen along with four  
175 graded choices of frequency, difficulty, or discomfort related to the presented listening  
176 scenarios. E.g.,

177

178 Item 1:

179 I find it difficult to talk with staff in places such as shops, cafes, or banks, due to struggling to  
180 hear what they are saying.

181

182 Item 10:

183 In group conversations I worry about mishearing people and responding based on incorrect  
184 information.

185

186 Response choices:

187 1) Not at all

188 2) Rarely

189 3) Often

190 4) Very often

191

192

### 193 **2.4 Stimuli**

194

195 Stimuli were four public domain short story audiobooks (*Summer Snow Storm* by Adam Chase;  
196 *Mr. Tilly's Seance* by Edward F. Benson; *A Pail of Air* by Fritz Leiber; *Home Is Where You Left It*  
197 by Adam Chase; source: LibriVox.org), spoken by two male speakers (two stories per speaker).  
198 Each story was about 25 min in duration and was pre-processed to truncate any silences  
199 between words that exceeded a 500-ms interval to 500 ms. On a block-by-block basis (see  
200 section 2.5 below), each audiobook was root-mean-square (RMS) normalized and scaled to 65  
201 dB SPL. Stimuli were presented to participants using ER1 Insert Earphones (Etymotic Research,  
202 Elk Grove Village, IL), shielded with copper foil to prevent electrical artifacts in the EEG data.

203

204 In order to minimize the odds of finding age-related differences in neural responses that could  
205 be attributed to reduced audibility in participants with hearing loss, all audio materials were  
206 custom-filtered for each participant with HL using a FIR filter implemented in MATLAB  
207 (Mathworks, Natick, MA) via the *designfilt* and *filter* functions. The filter was designed to apply  
208 half gain, amplifying all frequency bands by half the amount of the hearing loss:

$$\begin{aligned} 209 & \\ 210 & A(f) = 0.5 \times (T(f) - 20) \quad \text{when } T(f) > 20 \text{ dB HL,} \\ 211 & A(f) = 0 \quad \text{otherwise,} \end{aligned}$$

212  
213 where  $T(f)$  is the detection threshold in dB HL at frequency  $f$ . Note that half gain amplification is  
214 a commonly used strategy to mitigate reduced audibility due to hearing loss, while preventing  
215 discomfort from loudness recruitment, whereby loudness growth for frequencies affected by  
216 cochlear hearing loss is steeper than that observed in normal hearing (Fowler, 1936; Steinberg  
217 and Gardner, 1937).

## 218 219 **2.5 Experimental procedures**

220  
221 The experimental setup was implemented using the Psychophysics Toolbox (Brainard, 1997;  
222 Pelli, 1997; Kleiner et al., 2007) in MATLAB. Two experimental runs were completed by each  
223 study participant. In each run, a pair of audiobooks read by different male speakers (Fig. 1A)  
224 was presented diotically (the mixture of the two audiobooks in each ear) to the participant. One  
225 of the stories served as the *attended* story, while the other was the *ignored* story, with these  
226 designations being counter-balanced across participants. A run was broken up into 24-27 blocks  
227 (variation was due to small differences in durations of audiobooks used in each of the two  
228 runs). Each block contained a roughly 1-minute segment of audio, followed by a series of  
229 questions, detailed below. Block duration was allowed to exceed 1 minute in order to ensure  
230 that each block concluded at the end of a sentence in the attended story. The attended story  
231 remained the same throughout the run. To cue the participants to follow the correct story, the  
232 audio of the attended story started 1 sec prior to the onset of the ignored story. This was  
233 further aided by making this initial 1-sec portion of the attended story in each block (except  
234 block #1) correspond to the final 1-sec of the attended story from the previous block. These  
235 repeated segments with the attended story alone were excluded from statistical analyses.  
236 Throughout each block, participants were instructed to stay as still as possible, and to keep  
237 their gaze on a central fixation marker presented on a computer display in front of the  
238 participant. The purpose of this was to minimize EEG artifacts caused by muscle activity.

239 Following each block, participants were presented on a display with a series of Yes/No  
240 questions about the audio from that block, including:

- 241  
242 1) Four comprehension questions about the contents of the attended story  
243 2) Confidence ratings for each of the comprehension questions  
244 3) Intelligibility judgment about the attended speaker

245 4) Subjective attentiveness rating

246

247 As each behavioral question had binary answer choices (e.g., for attentiveness,  
248 participants answered “Were you able to stay focused on the target story?” Yes/No), the main  
249 purpose of these questions was to gather information about participants’ comprehension and  
250 subjective experience throughout the run, and to make sure that they were attending to the  
251 correct story.

252 Participants were given 10 seconds to answer each question using a key press. If 10  
253 seconds elapsed without a response, the question was marked as no-response. After answering  
254 each block’s questions, participants were allowed to request a short break to ensure that they  
255 remained comfortable throughout the experiment. These breaks were limited to up to two  
256 minutes, during which participants remained seated. The next block started as soon as the  
257 break was terminated by the participant with a key press, or two minutes elapsed.

258 Furthermore, between the two experimental runs, participants were offered an extended break  
259 inside the booth. The EEG cap and the insert phones were not removed during the breaks.

260 The second experimental run was procedurally identical to the first one, except a  
261 different pair of stories was presented, neither of which was used in the first run. Additionally,  
262 the attended and ignored speakers were switched, so that the speaker that narrated the  
263 ignored story in the first run was attended in the second run, while the attended speaker from  
264 the first run became the ignored speaker in the second run. Participants were explicitly  
265 informed of this switch, and the purpose of this was to balance any possible speaker effects on  
266 each participant’s EEG data.

267

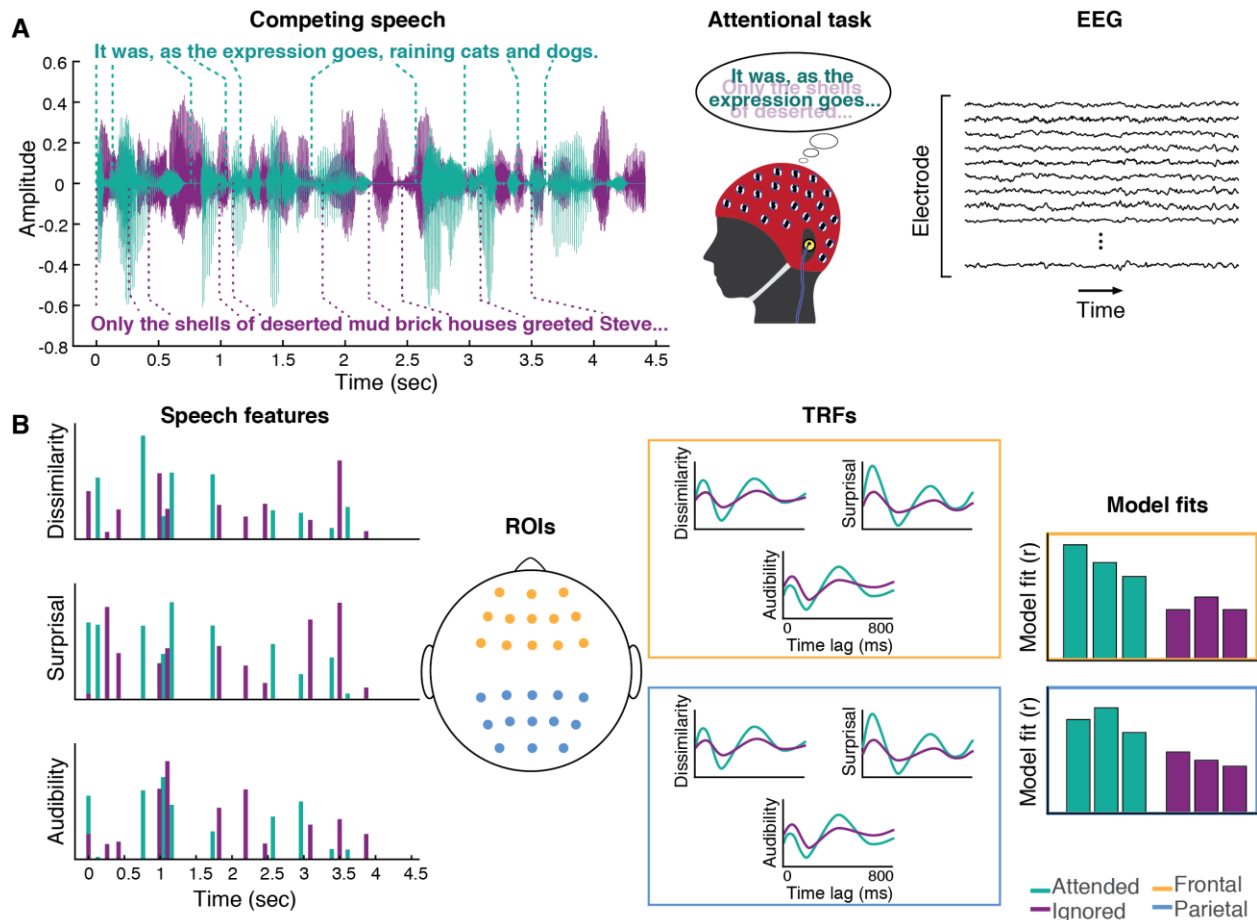

268

269

270

271

272

273

274

275

276

277

278

279

280

281

282

283

284

285

286

Figure 1. Experimental procedures. (A) Participants listened to a mixture of two speakers, while attending to one of them. Meanwhile, 64-channel EEG was recorded from their scalp. (B) Three word-level features (dissimilarity, surprisal, and audibility) were extracted from the speech for both the attended and ignored stories, and used to generate regressors containing impulses that were time-aligned to the word onsets scaled by the amplitude of each feature. These features were regressed against the EEG signals recorded during the experiment, resulting in TRF and model fit contributions for each of the features. These TRFs and goodness-of-fit values were averaged across groups of frontal (yellow) and parietal (blue) electrodes for use in group-level analyses.

## 2.6 EEG procedures

While engaging in the experimental task described above, each participant's EEG activity was sampled at 4096 Hz from their scalp using a Biosemi ActiveTwo system (BioSemi B.V., Amsterdam, The Netherlands), with 64 channels positioned according to the international 10-20 system (Klem et al., 1999). Additional external electrodes were placed on the left and right mastoids, and above and below the right eye (vertical electro-oculogram, VEOG). Prior to the beginning of the recording, and between the two runs, the experimenter visually inspected



287 signals in all electrodes, and for any electrodes with DC offsets exceeding  $\pm 20$  mV, the contact  
288 between the electrode and scalp was readjusted until the offset fell below  $\pm 20$  mV.

289

## 290 **2.7 EEG preprocessing**

291 All pre-processing analyses were implemented via the EEGLAB toolbox (Delorme and Makeig,  
292 2004) for MATLAB, unless otherwise stated. To reduce computational load, the raw EEG data  
293 were initially downsampled to 256 Hz, and band-pass filtered between 1 and 80 Hz using a  
294 Hamming windowed sinc FIR filter implemented in the *pop\_eegfiltnew* function of EEGLAB.  
295 Subsequently, data were pre-processed using the PREP pipeline (Bigdely-Shamlo et al., 2015).  
296 These steps included line noise removal, detection of disproportionately noisy channels via an  
297 iterative robust referencing procedure, interpolation of noisy channels, and referencing the  
298 data using the final “clean” estimate of the global mean activation. The benefit of this  
299 procedure is that it minimizes the risk of signal contamination from electrodes with abnormal  
300 signals (e.g., due to faulty hardware) during the referencing stage.

301 Next, activations from all experimental blocks were epoched and independent  
302 component analysis (ICA; Jutten and Herault, 1991; Comon, 1994) was applied to the data using  
303 the infomax ICA algorithm (Bell and Sejnowski, 1995) implementation in EEGLAB. This  
304 procedure decomposes the EEG signal into statistically independent sources of activation, some  
305 of which reflect sensory and cognitive processes, while others capture muscle-related signal  
306 contributions and other sources of noise. We removed all components that matched eye-blink  
307 related activity in component topography, amplitude, and temporal characteristics, as well as  
308 other high-amplitude artifacts that reflected muscle activity. This, on average, led to the  
309 removal of 2.52 (SD: 0.97) components.

310 The cleaned EEG signals were then band-pass filtered between 1 and 8 Hz with a  
311 Chebyshev type 2 filter designed using MATLAB's *designfilt* function (optimized to achieve 80  
312 dB attenuation below 0.5 Hz and above 9 Hz, with pass-band ripple of 1 dB), and applied to the  
313 data using the *filtfilt* function. Afterwards, the data were z-scored in order to control for inter-  
314 subject variability in the overall signal amplitude due to nuisance factors such as skull thickness  
315 or scalp conductivity, as well as to improve efficiency in the cross-validated regression and ridge  
316 parameter search for deriving the temporal response function (TRF), described below (section  
317 2.9.1). Finally, because run duration varied slightly due to unequal lengths of the two pairs of  
318 audiobooks (i.e. 24-27 minutes), in order to equalize contributions from each run to the overall  
319 analysis results, only blocks 2-23 from each run were used in the remaining analyses. The first  
320 block was excluded in order to minimize effects of initial errors in attending to the target story,  
321 which happened to a very small number of participants (less than 5), but was quickly corrected  
322 after initial comprehension questions were presented.

323

## 324 **2.8 Word timing estimation**

325 Word onset timings for all words within each story were estimated using the Montreal Forced  
326 Aligner (McAuliffe et al., 2017). Prior to running the aligner, the audiobook text was  
327 preprocessed to remove punctuation, typographic errors and abbreviations, and both the text

328 and audio were divided into roughly 30-sec segments. This segmented alignment approach was  
329 used in order to prevent accumulation of alignment errors for later portions of the audio. All  
330 alignments were subsequently manually inspected for timing errors, and when noticeable  
331 alignment errors were detected, the aligner was re-run on further-shortened (15 sec) segments  
332 of the affected audio. While forced alignment routinely results in some degree of timing errors,  
333 these are typically small, with a median of about 15 ms for the aligner used here. As such, only  
334 a small degree of temporal smearing of estimated neural responses should occur due to these  
335 errors.

336

## 337 **2.9 Data analysis**

338

### 339 **2.9.1 TRF analyses**

340 Time courses of cortical responses to different speech features, known as the TRFs, were  
341 extracted from preprocessed EEG activity using cross-validated regularized linear regression,  
342 implemented via the mTRF toolbox (Crosse et al., 2016). Briefly, deconvolution of a TRF for a  
343 given feature from the EEG signal is accomplished by first constructing a regressor containing a  
344 time series, sampled at a rate matching the EEG signal, of that feature's amplitudes. By  
345 including multiple time-lagged copies of the regressor for each feature, the effect of a given  
346 feature on the neural activity at different latencies relative to the word onset can be estimated,  
347 resulting in a time course of neural response. Regressors for all features are combined into a  
348 full design matrix, and this matrix is then regressed against the EEG signal to yield the impulse  
349 responses (i.e., TRFs) for each of the included features at each electrode site.

350 In practice, this procedure was implemented through 11-fold cross-validation, with each  
351 fold involving three steps. First, the data and regressors were split into a training set, composed  
352 of 40 blocks of the data (~40 minutes), and a testing set, containing the remaining 4 blocks of  
353 the data (~4 minutes). Next, the training set was used to determine the ridge parameter,  $\lambda$ , by  
354 iteratively fitting the cortical-response model using a range of ridge parameters. The TRF  
355 estimates were obtained for the  $\lambda$  parameter that produced the best model fit to the training  
356 data, as determined by the highest Pearson's correlation coefficient between the predicted and  
357 actual EEG signal. The TRF estimates were then used to assess the model fit for the test data.  
358 This was done by convolving the estimated TRFs with the corresponding word-feature  
359 regressors for the test data set, and computing the Pearson's correlation between the  
360 predicted and actual test data. Following cross-validation, average TRFs for each feature and an  
361 average model goodness-of-fit were computed from results of all cross-validation folds for use  
362 in group-level analyses.

363

#### 364 **2.9.1.1 Regression features**

365 Word features used in the regression analyses included semantic dissimilarity, surprisal, and  
366 word audibility (Fig. 1B).

367

##### 368 **2.9.1.1.1 Semantic dissimilarity**

369 Semantic dissimilarity, reflecting approximately the degree to which each word adds new  
370 information to a sentence, was computed as described in Broderick et al., (2018). Briefly, we  
371 used Google’s pre-trained *word2vec* neural network (Mikolov et al., 2013a, 2013b),  
372 implemented using the Gensim library (Rehurek and Sojka, 2010) for Python, to compute a 300-  
373 dimensional vector representation (otherwise known as an embedding) of each word within  
374 our stimuli. An important property of these vector representations is that in the 300-  
375 dimensional vector space, vectors of words with similar meanings point in similar directions.  
376 Computing correlation between vectors representing any two words approximates their  
377 semantic similarity. Because EEG response to incongruent words has been shown to elicit a  
378 strong N400 component (Kutas and Hillyard, 1980), for regression purposes these similarity  
379 values were subtracted from 1 to convert them to dissimilarity.

380 To construct semantic dissimilarity regressors, we computed the dissimilarity between  
381 each word’s vector, and the average of vectors for all preceding words in a given sentence. In  
382 the case of the first word in a sentence, we computed dissimilarity from the average vector for  
383 words in the previous sentence. These dissimilarity values were then used to construct the  
384 regressor consisting of unit-length impulses aligned to word onsets that were scaled by each  
385 word’s dissimilarity value and zeros between these impulses. Although neural responses to  
386 semantic content of words may not be strictly time-locked to word onsets, potentially leading  
387 to some degree of temporal smearing in the estimated TRFs, word onset timings have been  
388 successfully used as timestamps for characterizing higher-order lexical and semantic processes  
389 (e.g., Broderick et al., 2018; Weissbart et al., 2019).

390

#### 391 **2.9.1.1.2 Lexical surprisal**

392 Surprisal regressors were constructed in an identical way to dissimilarity, except the feature  
393 values were computed using OpenAI’s GPT-2 (Radford et al., 2019; 12-layer, 117M parameter  
394 version) artificial neural network (ANN), similar to the approach demonstrated by Heilbron et  
395 al. (2019). These procedures were implemented in Python using the Transformers library (Wolf  
396 et al., 2020) for PyTorch (Paszke et al., 2019). GPT-2 is a transformer-based (Vaswani et al.,  
397 2017) ANN that, using a “self-attention” mechanism, is capable of effectively using hundreds of  
398 words worth of preceding context in order to generate seemingly realistic sequences of text. As  
399 a result, it can be used as a proxy for computing the predictability of words within a sequence.  
400 Surprisal is calculated based on a much longer time scale (a large number of words in the  
401 preceding context) than semantic dissimilarity. Specifically, by providing GPT-2 with a segment  
402 of text and then generating the distribution over the next word, it is possible to assess the  
403 relative probability of the actual next word within GPT-2’s distribution of possibilities.  
404 Generation of all probabilities involves iteratively adding words into the context, and computing  
405 the probability of each successive word. In practice, GPT-2 utilizes a tokenized representation of  
406 text, whereby GPT-2’s vocabulary corresponds to a combination of whole words (particularly in  
407 the case of shorter words) and word fragments.

408 As a result, the probability of the  $i$ -th word  $w_i$  was computed as a product of conditional  
409 probabilities of the constituent word tokens  $t$ , with each token’s probability being computed

410 with the model's knowledge of the preceding tokens (i.e. preceding text plus current word's  
411 tokens whose probabilities were already estimated):

412

$$413 \quad p(w_i) = \prod_{j=1}^n p(t_{k+j} \mid t_{k+j-512}, \dots, t_{k+j-1}),$$

414

415 where  $j$  indexes the  $n$  tokens of word  $w_i$ ,  $k$  is the absolute index of the last token in the  
416 preceding word (relative to text beginning), and 512 is the maximum number of tokens utilized  
417 for prediction. For token indices less than 512 (i.e., early portions of the text), all of the  
418 available context was used. Furthermore, in cases where one or more tokens from the word at  
419 the far boundary of the context window did not fit into the 512 token limit, that word's tokens  
420 were excluded from being used for prediction. Note that although GPT-2 is capable of utilizing  
421 up to 1024 tokens for prediction, we utilized a context length of 512 tokens due to limited  
422 computational resources. Across the 4 stories, when full predictive context was utilized for  
423 prediction, it contained on average 393.3 [s.d. = 31.1] words.

424 Because brain mechanisms underlying lexical prediction respond more to unexpected  
425 than to expected words (Kutas and Hillyard, 1984), surprisal was computed by taking the  
426 negative log of the conditional probabilities of each word, leading to less expected words  
427 receiving higher surprisal values:

428

$$429 \quad S(w_i) = -\log(p(w_i))$$

430

### 431 **2.9.1.1.3 Audibility**

432 Word audibility regressors were constructed separately for the attended and ignored stories to  
433 capture the degree of masking of each word in one story by the speaker of the other story. In  
434 contrast to dissimilarity and surprisal, this value reflects the information at the shortest, word-  
435 by-word time scale, with higher signal-to-noise ratio (SNR) values reflecting greater peripheral  
436 fidelity of target speech, leading to lower uncertainty in speech identification on the basis of  
437 the bottom-up signal. For each word  $w_i$  in a given story, its audibility was defined in dB SNR  
438 units:

439

$$440 \quad Aud(w_i) = 20 \log \frac{RMS(y(w_i))}{RMS(z(w_i))},$$

441

442 where  $y(w_i)$  is the acoustic waveform of a word  $w_i$  spoken by one speaker, and  $z(w_i)$  is the  
443 acoustic waveform of the other speaker at the same time. Because neural responses have  
444 limited dynamic range while the audibility measure ranged from  $-\infty$  to  $\infty$ , the audibility values  
445 were rescaled to range from 0 to 1. In order to do this, audibility values were first clipped above  
446 10 dB and below -10 dB, and then scaled to the 0-1 range by:

447

$$448 \quad Aud_{scaled} = \frac{Aud + 10}{20}$$

449

450 Finally, because the distributions of regressor values had distinct means for different  
451 features, we normalized each feature's non-zero regressor values to have an RMS of 1. Bringing  
452 different features into similar amplitude ranges was done in order to make the amplitudes of  
453 corresponding TRFs more similar to each other, thus improving regularization performance.

454 It is notable that although neither dissimilarity, nor surprisal correlated with audibility ( $r$   
455 = 0.03 and -0.02, respectively), there was a modest correlation between dissimilarity and  
456 surprisal ( $r = 0.22$ ), suggesting that both features captured some aspects of speech  
457 predictability. Nevertheless, the fact that the correlation was relatively low suggests that much  
458 of the variance in each of the two features captured distinct aspects of the linguistic content in  
459 the speech stimuli.

460

### 461 **2.9.2 Feature-specific model performance**

462

463 After fitting the full three-feature model as described above, we computed the unique  
464 contribution of each feature to the overall model fit using procedures described in Broderick et  
465 al. (2020). Briefly, on each cross-validation fold, we estimated each feature's contribution to the  
466 overall fit by comparing the goodness-of-fit for the full model to a null model, in which that  
467 feature's contribution was eliminated. This was done by permuting regressor values of that  
468 feature, while maintaining their original timing. For all other features, the original regressors  
469 were used. Null model fits were computed by convolving the estimated TRFs with these  
470 regressors and correlating the predicted EEG waveform with the test data. This procedure was  
471 repeated 10 times to estimate the average null-model performance. Each feature's model  
472 contribution was then computed as the difference between the goodness-of-fit metrics for the  
473 full model and its null model.

474

### 475 **2.9.3 Regions of interest**

476

477 To strengthen our statistical analyses in light of inter-subject variability due to nuisance  
478 variables such as head shape and electrode cap placement, all analyses were performed on two  
479 regions of interest (ROI) derived by averaging model goodness-of-fit and TRFs from subsets of  
480 frontal and parietal electrodes (Fig. 1B). The parietal ROI was chosen because of prior evidence  
481 that responses to higher-level features such as dissimilarity or surprisal tend to peak over  
482 parietal sites near electrode Pz (e.g., Broderick et al., 2018; Weissbart et al., 2019). The frontal  
483 ROI was included because we hypothesized that recruitment of frontal regions may aid  
484 prediction and disambiguation of the speech signals, particularly in challenging listening  
485 scenarios such as in the presence of a competing speaker.

486

487

### 488 **2.9.4 Statistical analysis**

489

490 Group-level statistical analyses were applied to pooled outputs of single subject TRF analyses.  
491 Prior to performing statistical tests, outliers were detected using a two-stage approach, applied  
492 separately to samples from each age group to minimize the influence of true between-group  
493 differences on this procedure. First, full model goodness-of-fit values that were more than 1.5  
494 inter-quartile ranges (IQR) below the goodness-of-fit corresponding to the lower quartile, or 1.5  
495 IQR above the value corresponding to the upper quartile were detected as outliers. No  
496 participant met this criterion. Second, for each feature's TRF for the attended stories (which  
497 were generally more robust compared to the ignored stories), we used the same 1.5 IQR  
498 criterion to detect outliers at each time point of the TRF. Subsequently, we computed the  
499 proportion of outlier time points for each subject. We set the outlier-proportion criterion to  
500 0.15, so that participants with more than 15% of outlier time points were detected as outliers.  
501 This led to the exclusion of 2 participants (1 YA, and 1 OA), leaving a total of 39 participants (19  
502 YA and 20 OA, including 17 with HL) in the analysis.

503 A mixed-design ANOVA with a between-subjects factor of age group (YA vs. OA), and  
504 within-subject factors of ROI (frontal vs. posterior), model feature (dissimilarity, surprisal, and  
505 audibility), and attention (attended vs. ignored story) was used to assess how these factors  
506 related to the feature-specific contributions to the model fit. Post-hoc tests were conducted  
507 using two-tailed t-tests or the analogous non-parametric test, depending on the outcome of an  
508 Anderson-Darling test of normality on the data.

509 Comparisons of TRFs for the attended and ignored stories were performed for each time  
510 point of the TRFs using two-tailed, paired-samples t-tests. Because this involved hundreds of  
511 statistical comparisons, we applied the *false discovery rate* (FDR; Benjamini and Hochberg,  
512 1995) correction to control for the proportion of false positives among all significant  
513 discoveries. Similarly, between-group comparisons (i.e., younger vs. older adults) were  
514 performed on TRF time courses, with two-sample t-tests applied separately to the attended and  
515 ignored TRFs and corrected using the FDR method.

516 Finally, exploratory correlation analyses were performed on different combinations of  
517 neural (e.g., full model goodness-of-fit, feature-wise model contributions, TRF amplitudes) and  
518 behavioral metrics (e.g., comprehension, confidence, and SSQ<sub>m</sub> scores). In these analyses we  
519 corrected each set of correlations using the Bonferroni correction. Importantly, we used less  
520 stringent multiple comparisons correction (i.e., not correcting by the total number of  
521 comparisons across all combinations of correlated variables), because of the large number of  
522 comparisons performed.

523

### 524 **3. Results**

525

#### 526 **3.1 Behavioral measures of speech understanding**

527

528 Following each 1-minute block of listening to a two-talker speech mixture, participants  
529 responded to four true/false questions about the content of the attended story and indicated  
530 their confidence about their response. The average performance on this comprehension task

531 was 83.2% (SD: 6.8%, 65.9 - 94.2% range), significantly above the 50% chance level [ $t(38) =$   
532  $30.48, p < 0.001$ ], indicating that participants were successfully able to attend to the target  
533 speaker and comprehend the content of the story. We found a significant effect of age on  
534 performance [ $t(37) = -3.04, p = 0.004$ ], with older participants performing better than younger  
535 participants (YA: mean  $\pm$  s.d. =  $80.1 \pm 7.5\%$ , OA:  $86.1\% \pm 4.6\%$ ). A correlation analysis with age  
536 used as a continuous variable showed the same association with the proportion of correct  
537 responses ( $r = 0.33, p = 0.043$ ). Confidence measures showed the same general pattern of  
538 results as the comprehension scores and the two measures were positively correlated [ $r = 0.69,$   
539  $p < 0.001$ ], indicating that participants had good awareness of their performance.

540 Because hearing loss was more common among the older participants, and we  
541 compensated for it by amplifying the audio in frequency ranges of elevated thresholds (see  
542 Methods), we assessed whether this amplification could account for the difference in  
543 performance. As expected, in the portion of participants who received amplification ( $n = 17$ ),  
544 there was no relationship between average high-frequency audiogram (2-8 kHz range), and  
545 comprehension-performance ( $r = 0.06, p = 0.81$ ) or confidence ( $r = 0.2, p = 0.44$ ) measures. The  
546 same pattern was observed when using the average of the entire 0.25-8 kHz range of  
547 audiometry. As such, there was no evidence that amplification had an impact on performance,  
548 or that it could account for between-group differences in performance.

549 Prior to the experimental session, each participant filled out a modified subset of the  
550 SSQ (SSQ<sub>m</sub>) questionnaire to assess their subjective difficulties with speech-in-noise perception.  
551 We found no difference in these measures between younger and older participants ( $z = -0.42, p$   
552  $= 0.67$ , Mann-Whitney U-test), and no correlation between SSQ<sub>m</sub> score and the proportion of  
553 correct responses from the behavioral task ( $r = -0.17, p = 0.29$ ), or between SSQ<sub>m</sub> and high-  
554 frequency hearing loss ( $r = 0.03, p = 0.91$ ).

555

### 556 **3.2 Cortical measures of speech-mixture processing**

557

558 In order to characterize cortical responses to semantic content of speech, we applied  
559 computational models to EEG responses measured while participants listened to a mixture of  
560 two distinct narrative stories, while attending to one of them. The features included in the  
561 model were word audibility reflecting word-by-word fidelity of the incoming acoustic signal,  
562 semantic dissimilarity reflecting short-term (sentence timescale) dissimilarities between the  
563 word2vec vector characterizing each word and its immediately preceding context, and word  
564 surprisal reflecting long-term predictability of each word given the preceding multi-sentence  
565 context.

566

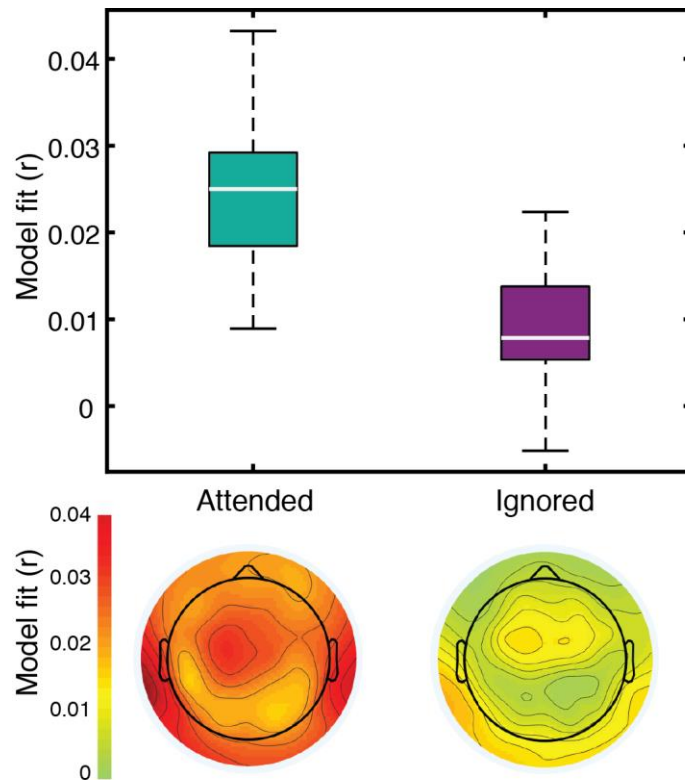

567  
568 Figure 2. The three-feature model explained a significant amount of variance in responses to  
569 both attended and ignored speech. Box plots (top) represent distributions of goodness-of-fit  
570 values averaged over electrodes across all participants. The topographic plots (bottom) depict  
571 the distribution of goodness-of-fit values for attended and ignored speech across the scalp.  
572

573 Linear regression of these features against the EEG signal produced responses that  
574 explained a significant amount of variance in the data pooled across participant groups and  
575 electrodes, as reflected by a significant positive correlation between the full-model EEG  
576 prediction and held-out data for both attended [ $t(38) = 20.87, p < 0.001$ ] and ignored [ $t(38) =$   
577  $8.75, p < 0.001$ ] speech, with a significantly stronger fit for the former ( $t(38) = 10.60, p < 0.001$ ;  
578 Fig. 2). The same pattern of results was observed when examining model fits in frontal and  
579 parietal ROIs. Figure 3 depicts the average attended (green) and ignored (purple) TRFs in the  
580 two ROIs for each of the features included in the model. We observed robust responses to the  
581 attended story for each of the features included in the model, with prominent early ( $\sim 100$  ms)  
582 and late ( $\sim 400$  ms) peaks in neural activity. In contrast, the ignored story elicited comparatively  
583 flatter responses, with predominantly early peaks in neural activity. Indeed, most features  
584 showed extensive periods in the early and late portions of the TRFs where attended and  
585 ignored responses differed significantly, as depicted by black horizontal bars at the bottom of  
586 each TRF plot (indicating FDR-corrected significant time points).

587



## Aging Effects on Speech Tracking

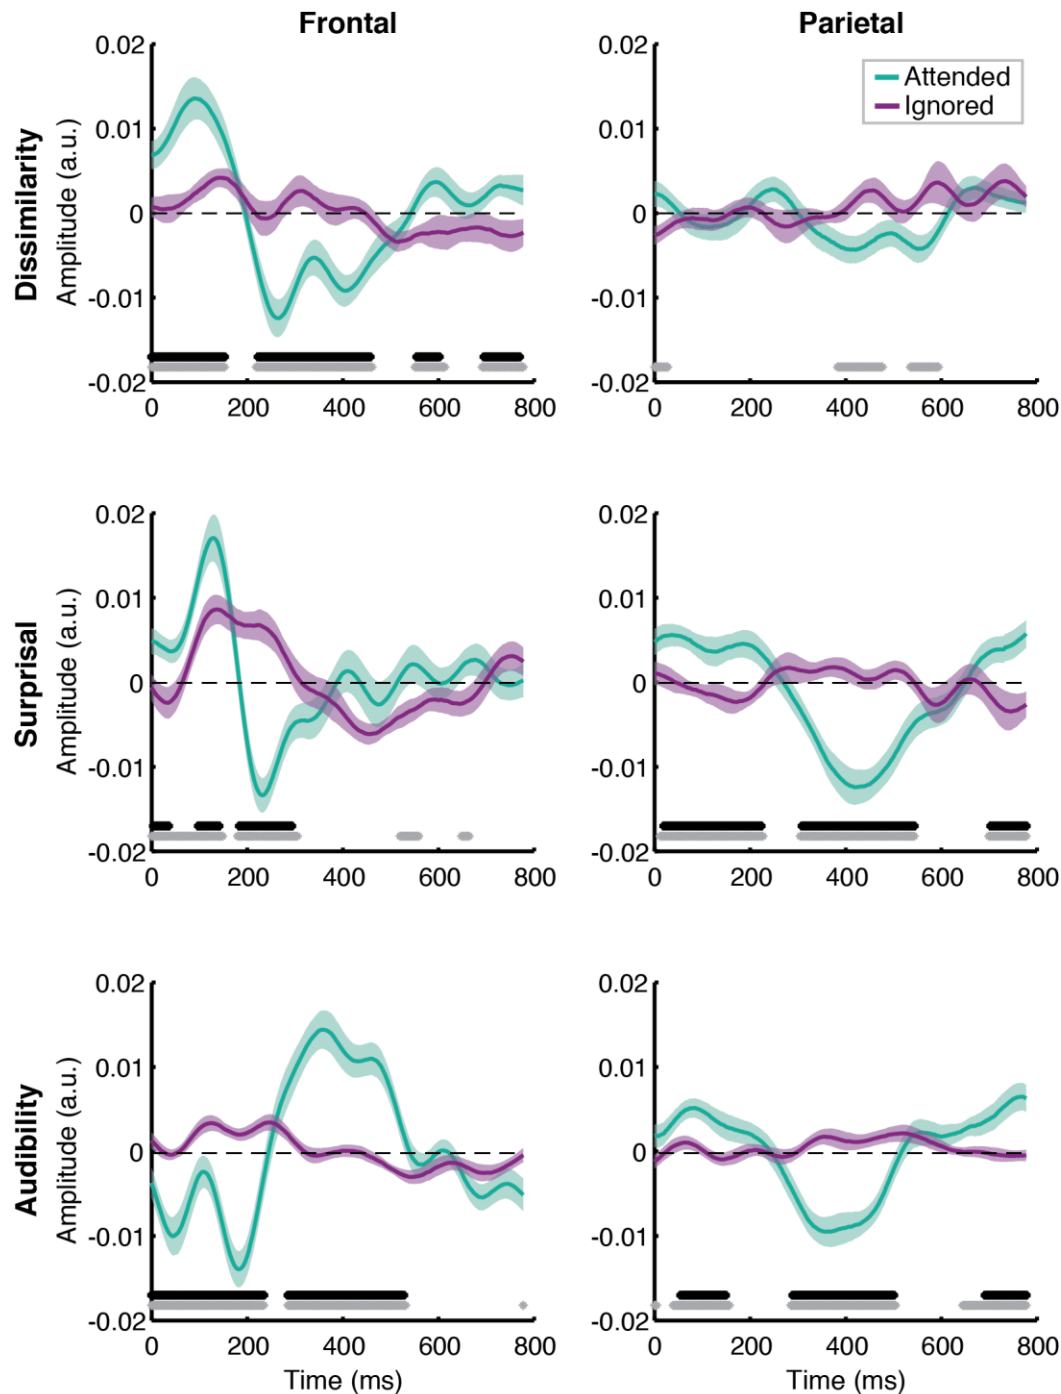

588

589 Figure 3. Attentional modulation of feature-specific responses. Each plot depicts the  
590 comparison of TRFs averaged across all participants for attended (green) and ignored (purple)  
591 speech for each of the features (panel rows) and ROIs (panel columns). The upper and lower  
592 bound of each curve represents  $\pm 1$  standard error (SE) of the mean. Black and gray horizontal  
593 bars at the bottom of the plots indicate time intervals over which attended and ignored TRFs  
594 differed significantly at the FDR-corrected and uncorrected level, respectively, with  $\alpha = 0.05$ .

595

596 Contributions of each feature to the overall model fit for both age groups are plotted in  
597 Fig. 4. Model fit contribution values represent the difference in goodness-of-fit for the held-out  
598 EEG data between the full model and null models in which a given feature's regressor was  
599 selectively disrupted by shuffling its feature amplitudes (see section 2.9.2). Thus, for a  
600 particular feature, a model fit contribution exceeding 0 represents the scenario where the EEG  
601 responses scaled, to some degree, with that feature's regressor values. To compare how these  
602 model contributions differed in the two age groups, we performed a mixed-design ANOVA with  
603 within-subject factors of ROI, model feature, and attention, and a between-subjects factor of  
604 age group (Table 1). As expected, we found a main effect of attention [ $F(1,37) = 34.28$ ,  $p <$   
605  $0.001$ ,  $\eta_p^2 = 0.48$ ] reflecting generally stronger tracking of high-level features within the  
606 attended than ignored speech stream. We also found main effects of ROI [ $F(1,37) = 8.89$ ,  $p =$   
607  $0.005$ ,  $\eta_p^2 = 0.19$ ], feature [ $F(2,74) = 18.48$ ,  $p < 0.001$ ,  $\eta_p^2 = 0.33$ ], and age group [ $F(1,37) = 7.92$ ,  
608  $p = 0.008$ ,  $\eta_p^2 = 0.18$ ].  
609

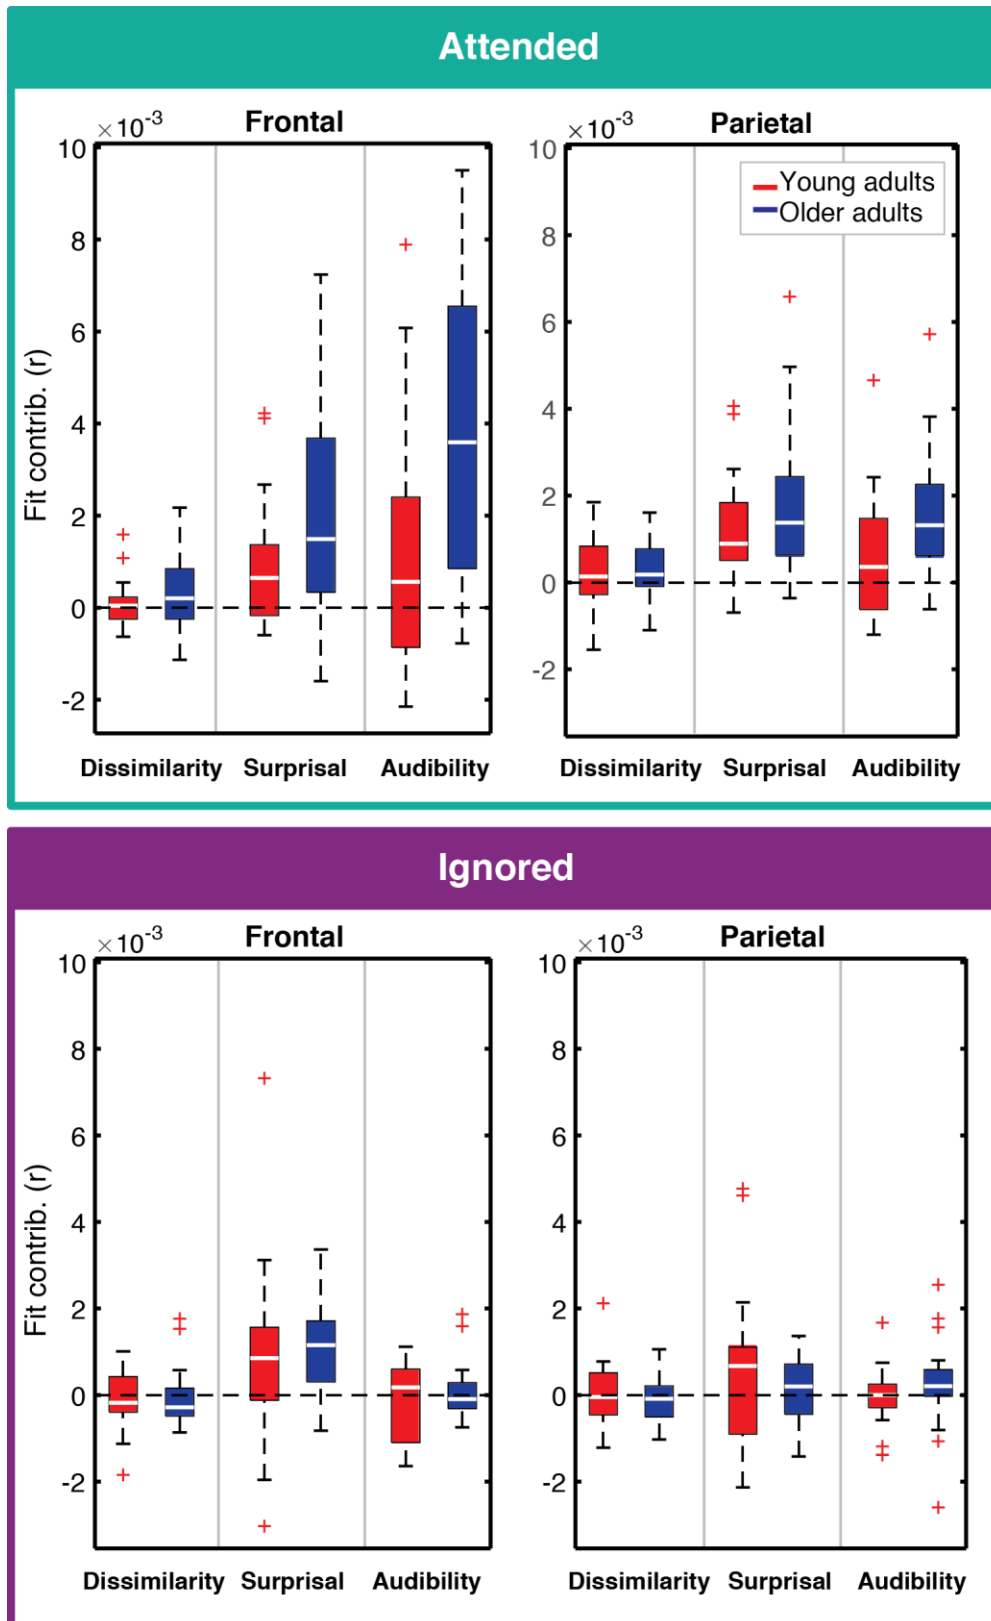

610

611 Figure 4. Feature-specific contributions to the model fit for attended (top) and ignored

612 (bottom) responses. Each panel depicts the box plot of model fit contributions for each of the

613 three features in the younger (red) and older (blue) adult groups. Left and right panels  
614 represent results for frontal and parietal ROIs, respectively. Note that some points are depicted  
615 with red + signs as outliers in order to better depict where the bulk of the points lie within the  
616 fit contribution distributions. However, all data points were utilized in statistical analyses  
617 described in the text.

618

619 In addition to these main effects, we detected a number of significant interactions.  
620 There was a significant interaction between attention and age group [ $F(1,37) = 7.64, p = 0.009,$   
621  $\eta_p^2 = 0.17$ ], reflecting an overall greater difference between attended and ignored fits in older  
622 than younger participants [ $t(37) = -2.76, p = 0.009$ ]. A significant interaction between ROI and  
623 age group [ $F(1,37) = 7.24, p = 0.011, \eta_p^2 = 0.164$ ] was associated with significantly stronger  
624 contributions to model fits across features at the frontal compared to the parietal ROI in older  
625 adults ( $p = 0.007$ ; Mann-Whitney U-test). Third, we found a significant interaction between  
626 feature and age group [ $F(2,74) = 4.09, p = 0.021, \eta_p^2 = 0.10$ ], and a post hoc analysis revealed  
627 this was due to greater difference in contributions to model fit between word audibility and  
628 dissimilarity in older than younger participants [ $t(37) = -3.01, p < 0.005$ ; Bonferroni corrected  
629 with  $\alpha = 0.017$ ].

630 Several interactions did not involve age group, including a significant interaction  
631 between attention and feature [ $F(1.8,66.63) = 8.55, p = 0.001, \eta_p^2 = 0.19$ ], a trend towards an  
632 interaction between feature and ROI [ $F(1.68, 62.18) = 3.2, p = 0.056, \eta_p^2 = 0.08$ ], and a three-  
633 way interaction between attention, feature, and ROI, [ $F(2,74) = 13.05, p < 0.001, \eta_p^2 = 0.21$ ].  
634 Because the latter interaction was a combination of factors from the former two, we only  
635 pursued post hoc analyses for the three-way interaction. These indicated that in the frontal  
636 ROI, the contribution of audibility to the model fit was greater for the attended than the  
637 ignored story, and that this differential was greater than that for both dissimilarity and surprisal  
638 [ $t(38) = -3.38, p = 0.002$ , and  $t(38) = -3.61, p < 0.001$ , respectively; Bonferroni corrected with  $\alpha =$   
639  $0.017$ ]. Comparison of dissimilarity and surprisal showed no difference [ $t(38) = 1.38, p = 0.18$ ].

640 Although the goodness-of-fit analyses above indicate that there are significant  
641 differences in processing of attended and ignored speech between younger and older  
642 participants, they do not provide insight into the timing and amplitude of the underlying neural  
643 responses. To explore if our data contain evidence of age-related differences in neural  
644 responses, we statistically compared TRF amplitudes between the two age groups at each time  
645 point in the 0 to 800 ms range. Because these analyses involved hundreds of point-by-point  
646 comparisons between groups, we corrected for false discovery rate (FDR), and focused on  
647 comparisons at the level of individual features, rather than utilizing more complex interaction  
648 metrics. As such, these analyses were relatively rudimentary, and should be considered as  
649 exploratory in their nature.

## Aging Effects on Speech Tracking

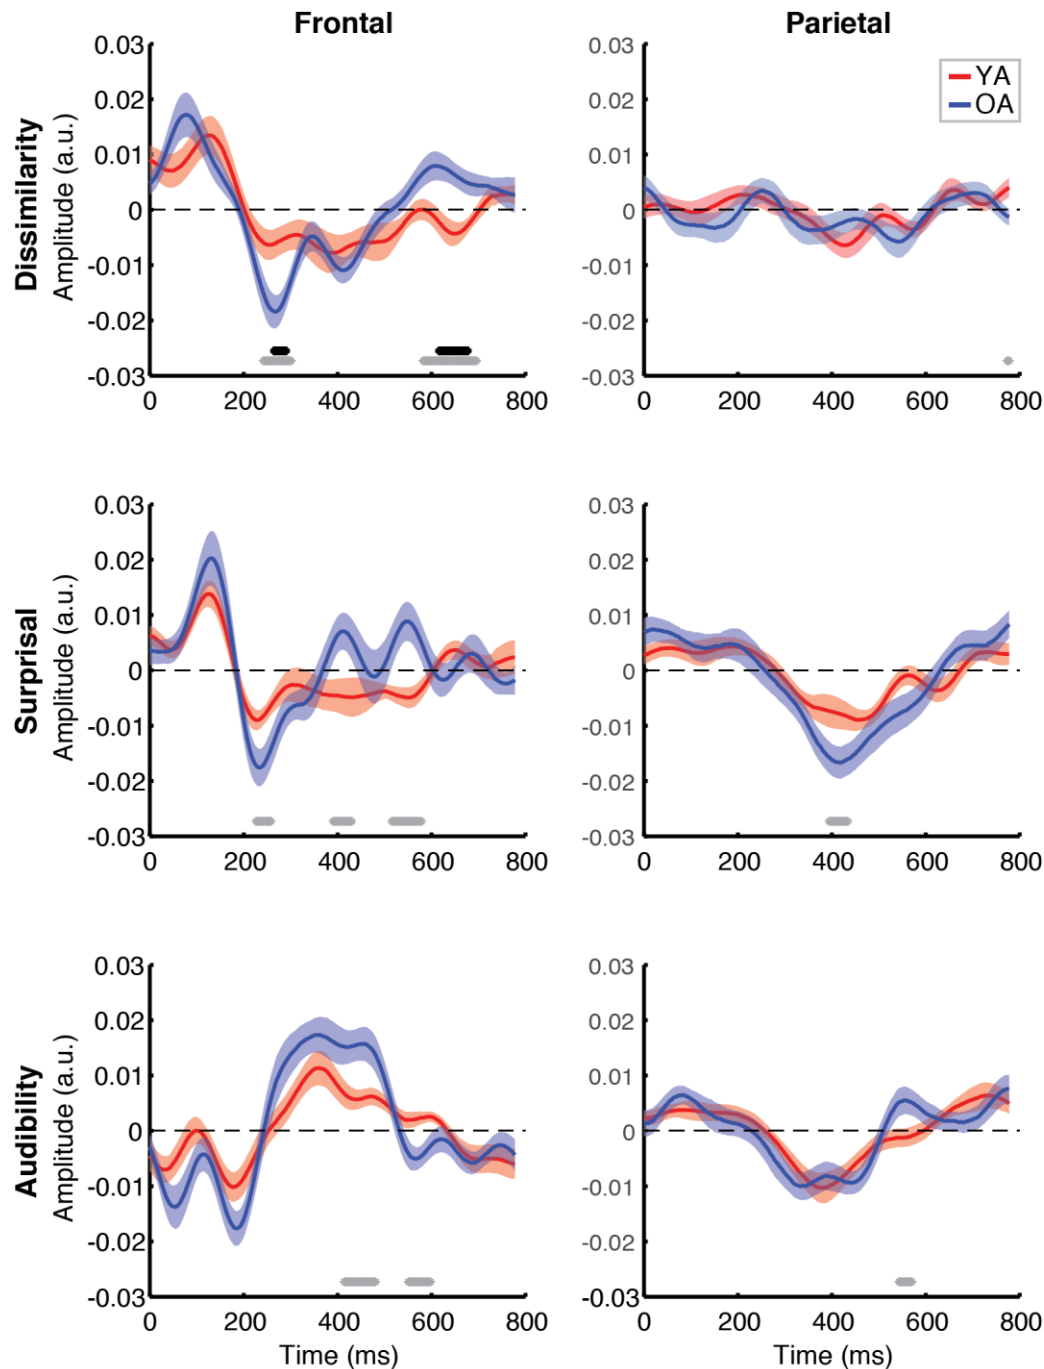

650

651 Figure 5. Between-group comparison of TRFs for attended speech. Each plot depicts a  
652 comparison of TRFs between younger (red curves) and older (blue curves) participants, for  
653 different features (panel rows) and ROIs (panel columns). Black and gray horizontal bars at the  
654 bottom of the plots indicate time points at which the two age groups differed significantly at  
655 the FDR-corrected and uncorrected level, respectively, with  $\alpha = 0.05$ .

656

657 Figure 5 depicts the differences in responses to the attended speech between younger  
658 (red lines) and older (blue lines) participants, separately for each feature (plot rows) and ROI

659 (plot columns). Two-tailed statistical outcomes at the  $p < 0.05$  level are depicted at the bottom  
660 of each plot in both uncorrected (gray horizontal bars) and FDR-corrected (black horizontal  
661 bars) forms. At the FDR-corrected level, we only found two clusters of significant time points in  
662 the frontal TRFs for dissimilarity, with older participants showing a significantly more negative  
663 response between approximately 260-300 ms, and a significantly more positive response in the  
664 620-675 ms time range. While surprisal and audibility showed no robust differences at the FDR-  
665 corrected level, several clusters of time points were suggestive of group differences at the level  
666 of uncorrected statistics. For surprisal, we found that older adults had a greater negative  
667 deflection in the 225-260 ms time range and a pair of positive deflections around 390-430 and  
668 515-580 ms that were absent in the TRF of the young adults at the frontal ROI. We also found a  
669 single cluster of time points with greater negative deflection for older than younger adults  
670 between 395-435 ms in the parietal ROI. For word audibility, we found a prolonged elevated  
671 response with portions between 415-480 ms exhibiting larger positive deflection in older than  
672 younger participants, at the frontal ROI. Older adults also showed a greater negative deflection  
673 in the word-audibility TRF frontally, and a greater positive deflection parietally around 550-600  
674 ms.

675       Between-group comparison of TRFs for ignored speech are shown in Figure 6. Unlike  
676 responses to attended speech, most features, with the exception of frontal TRFs for surprisal,  
677 show largely flat response patterns that do not differ between groups. Several time points  
678 showed a difference in uncorrected statistics for each of the features, the most notable of  
679 which was a more negative response of younger adults to audibility between 590-660 ms in the  
680 frontal ROI. However, given the low amplitude of the TRFs, and long latencies of most of the  
681 potential differences, we believe these are likely to simply reflect false discoveries due to  
682 hundreds of comparisons. Indeed, fewer than 5% of comparisons for ignored speech were  
683 significant at the uncorrected level.

## Aging Effects on Speech Tracking

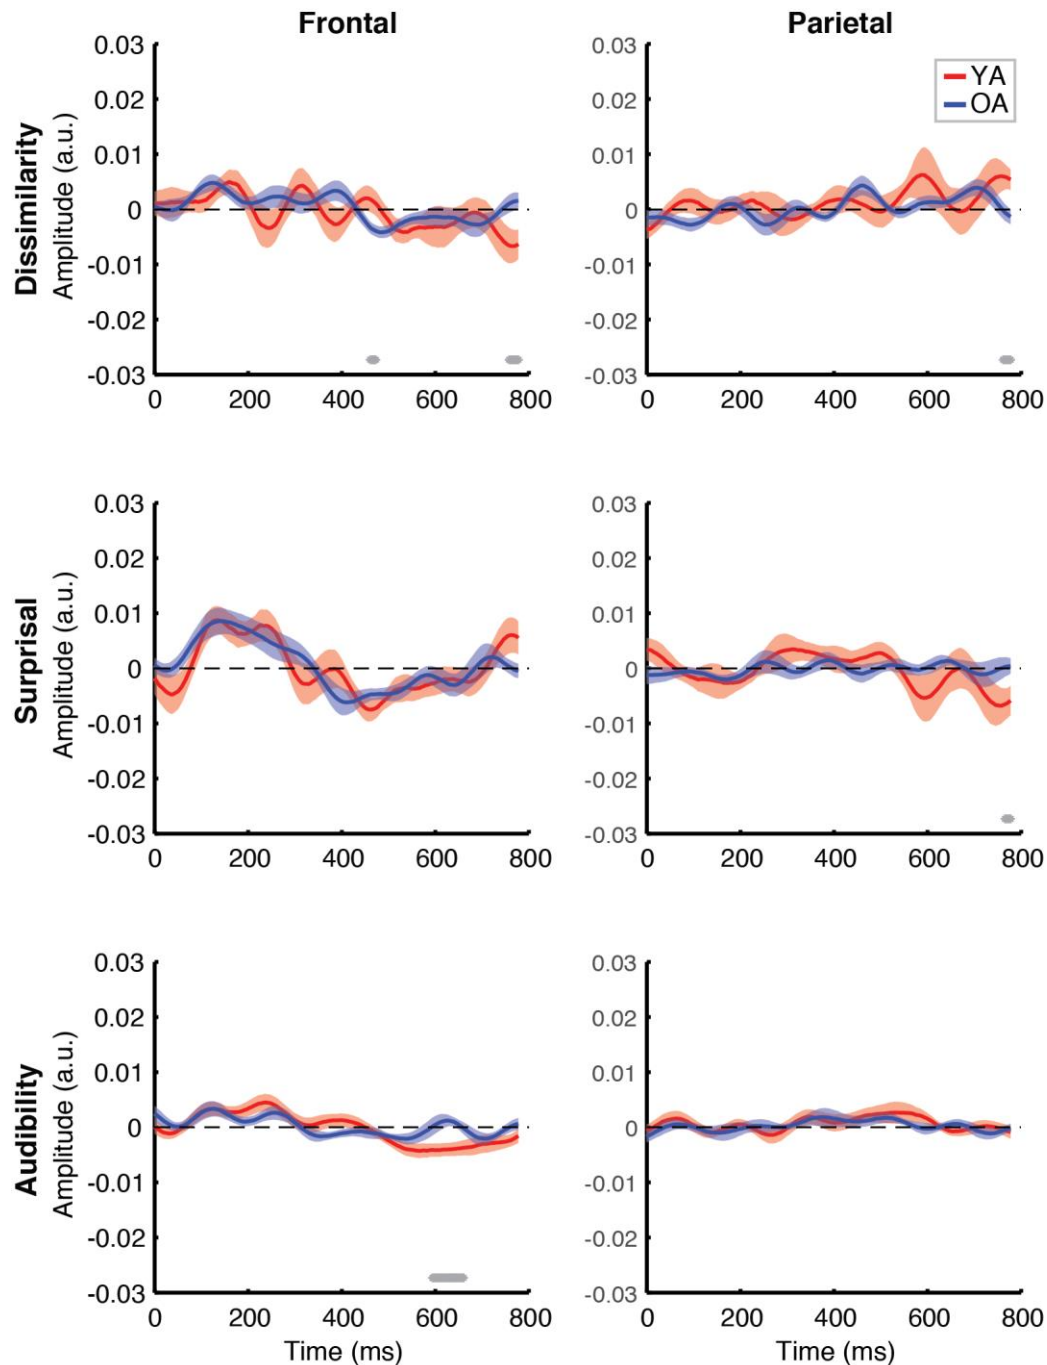

684

685 Figure 6. Between-group comparison of TRFs for ignored speech. Subplot arrangement and  
686 statistical comparisons are as in Fig. 5.

687

688 To complement these exploratory point-by-point analyses, we also conducted between-  
689 groups analyses specifically targeted at comparing responses in the time range of the N400  
690 response. To this end, we compared each feature's average TRF amplitudes in the 300-500 ms  
691 range. Because previous work found little to no evidence of N400 for ignored speech, these  
692 comparisons were only done for attended speech. Although we found both a significantly more

693 negative parietal N400 for the older group to surprisal [ $t(37) = 2.03$ ,  $p = 0.05$ ], and a significantly  
694 elevated frontal response in the older group for audibility [ $t(37) = -2.72$ ,  $p = 0.01$ ], neither of  
695 these results remained significant with Bonferroni correction ( $\alpha = 0.008$ , given the total  
696 number of 6 comparisons).

697  
698

### 699 3.3 Neuro-behavioral correlations

700

701 We next sought to examine how our electrophysiological measures related to behavioral  
702 responses during the experiment, and the SSQ<sub>m</sub> scores obtained prior to this experiment. To  
703 this end, we conducted a number of exploratory analyses, including correlations between  
704 behavioral measures and the overall model goodness-of-fit, feature-specific model  
705 contributions, and the average TRF amplitudes in the 300-500 ms time range. Given the number  
706 of these analyses, and our limited sample size, we focused our analyses on full participant  
707 samples, rather than age group comparisons. Because of the less stringent multiple  
708 comparisons correction procedure (only correcting by the number of statistical tests within  
709 each analysis), significant effects in this section should be interpreted as trends rather than true  
710 statistical effects.

711

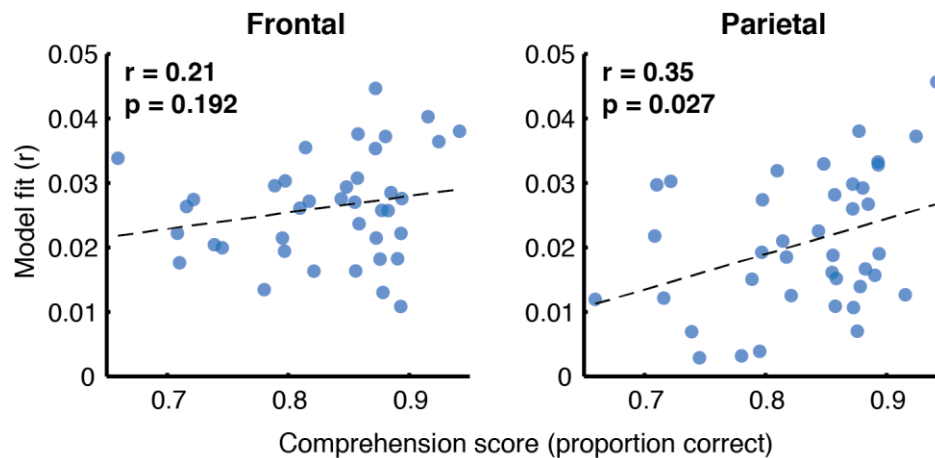

712

713 Figure 7. Scatterplots showing the relationship between the full model goodness-of-fit and the  
714 proportion of correct responses on the comprehension questions. Pearson's correlation  
715 coefficients and the corresponding uncorrected p-values are shown for frontal (left plot) and  
716 parietal (right plot) ROIs. Symbols represent data from individual participants pooled across the  
717 two age groups, YA and OA.

718

719 Figure 7 depicts the relationship between the proportion of correct responses on  
720 comprehension questions during the experiment, and the overall model goodness-of-fit in the  
721 frontal (left panel) and parietal (right panel) ROIs. While we observed no relationship in frontal  
722 regions ( $r = 0.21$ ,  $p = 0.19$ ), there was a marginally significant positive association between the  
723 two measures ( $r = 0.35$ ,  $p = 0.027$ , Bonferroni corrected  $\alpha = 0.025$ ) in the parietal ROI. A similar



724 pattern of results was observed when average confidence ratings for the comprehension  
725 questions were used instead of the performance itself. Relationships between the proportion of  
726 correct responses and feature-specific contributions to the model fit are depicted in Figure 8.  
727 We observed a trend towards a positive association for word audibility in both the frontal ( $r =$   
728  $0.29$ ,  $p = 0.07$ ) and parietal ROIs ( $r = 0.4$ ,  $p = 0.011$ ), although neither correlation reached  
729 significance after correcting for multiple comparisons ( $\alpha = 0.008$ ). None of the other features  
730 showed a significant association with comprehension scores.  
731

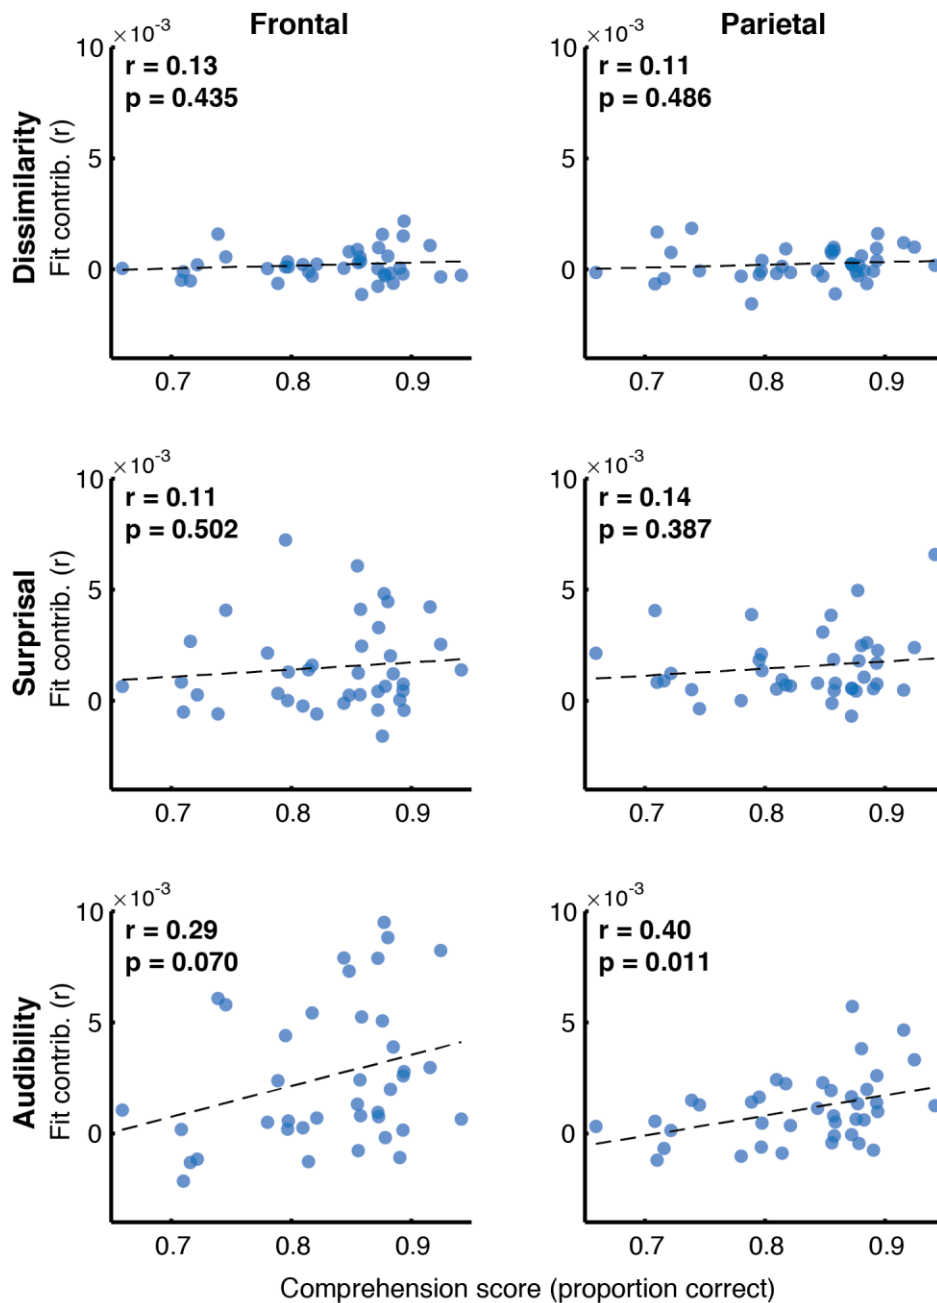

732  
733 Figure 8. Scatterplots of comprehension scores and feature-specific model contributions.  
734 Different rows of panels refer to different features and different columns correspond to the

735 two ROIs. Pearson's correlations and the corresponding uncorrected p-values are shown in the  
736 upper portion of each panel.  
737

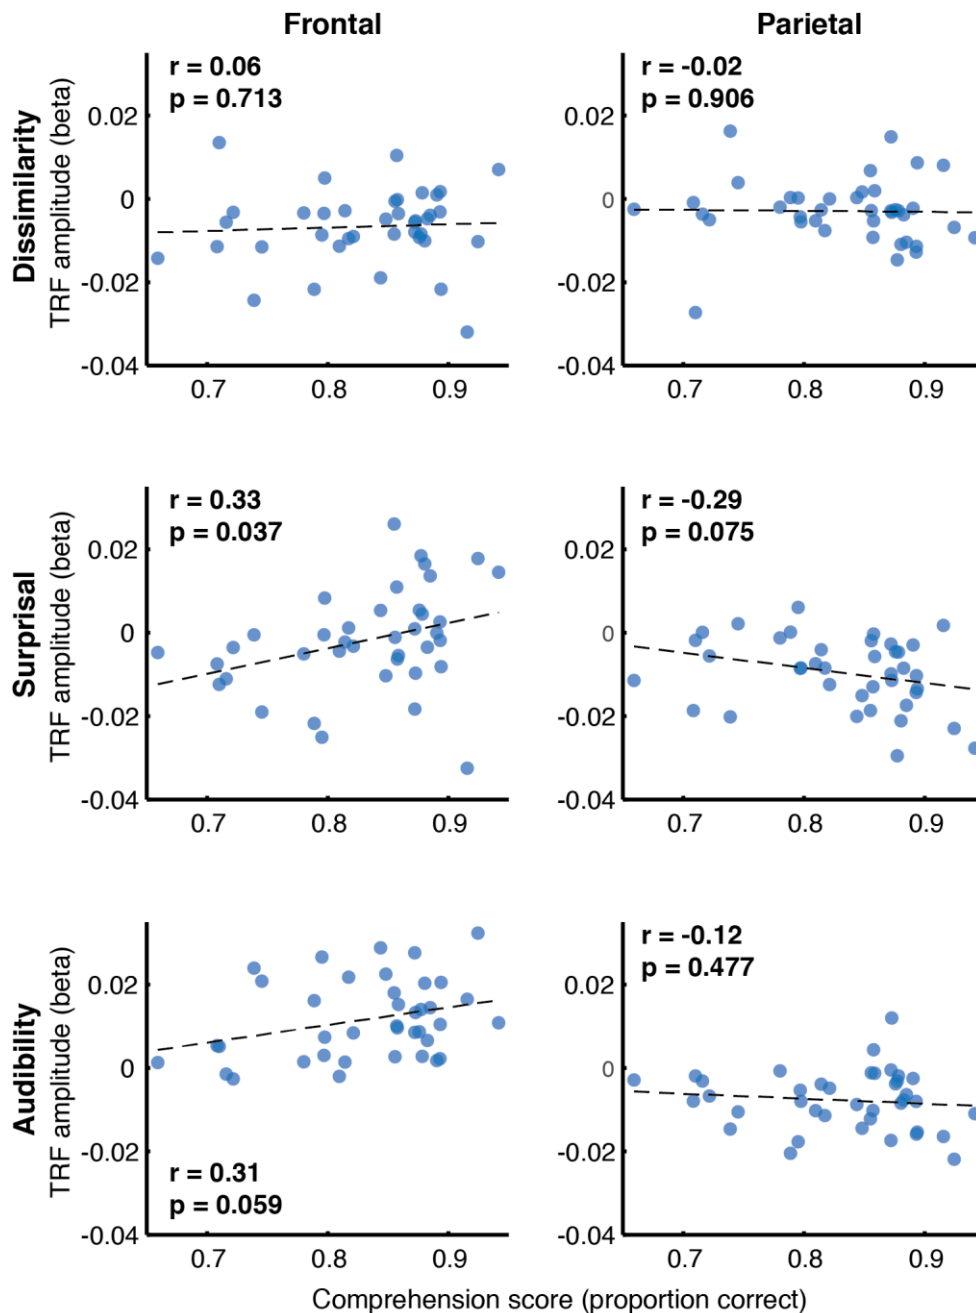

738  
739 Figure 9. Scatterplots of comprehension scores and mean TRF amplitudes between 300-500 ms.  
740 Figure layout is as in Fig. 8.

741  
742 Next, we explored the possible relationship between the comprehension scores  
743 (proportion correct) and the average TRF amplitude in the 300-500 ms time range, when N400  
744 effects generally appear parietally. These analyses, shown in Figure 9, revealed trends towards

745 a positive relationship in frontal regions for surprisal ( $r = 0.33$ ,  $p = 0.037$ ) and audibility ( $r = 0.31$ ,  
746  $p = 0.059$ ), as well as a trend towards a negative relationship for surprisal in parietal ROI ( $r = -$   
747  $0.29$ ,  $p = 0.075$ ). As before, none of these associations were significant when correcting for  
748 multiple comparisons. Although this analysis focused broadly on the time range of N400, two of  
749 the frontal trends were associated with positive, rather than negative deflections in the TRF.  
750

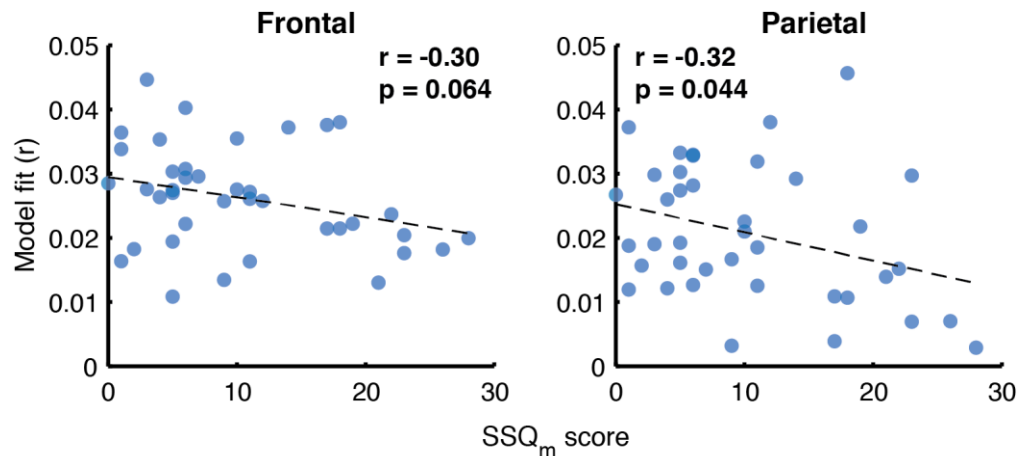

751  
752 Figure 10. Scatterplots of SSQ<sub>m</sub> scores and overall model goodness-of-fit for frontal (left panel)  
753 and parietal (right panel) ROIs. Note that a higher score on SSQ<sub>m</sub> questionnaire reflects a  
754 greater difficulty with understanding speech in noise.  
755

756 Correlation analyses examining the relationship between subjective SIN perception  
757 difficulties, captured by the SSQ<sub>m</sub> scores, and the full model goodness-of-fit metric (Fig. 10)  
758 revealed trends towards a negative relationship in both the frontal ( $r = -0.30$ ,  $p = 0.064$ ) and  
759 parietal ROIs ( $r = -0.32$ ,  $p = 0.044$ ). However, analyses of relationships with feature-specific TRF  
760 amplitudes and model contributions revealed no feature for which these trends were apparent.

761 Finally, because a portion of the participants had mild hearing loss at high frequencies  
762 (which was compensated for by amplifying speech in the corresponding frequency ranges; see  
763 Methods), we examined if and how high-frequency (2-8 kHz) hearing thresholds related to the  
764 overall model fits (Fig. 11). Although we found no relationship between the average hearing  
765 thresholds over the 2-8 kHz range and model goodness-of-fit for attended speech (Frontal ROI:  
766  $r = -0.04$ ,  $p = 0.87$ ; Parietal ROI:  $r = -0.02$ ,  $p = 0.95$ ), there was a significant negative correlation  
767 for ignored speech both frontally ( $r = -0.59$ ,  $p = 0.013$ ) and parietally ( $r = -0.62$ ,  $p = 0.008$ ). At  
768 the level of feature-specific contributions to the model fit, there was no indication that this  
769 negative correlation was driven by any particular feature, as most features showed low, non-  
770 significant negative correlations.  
771

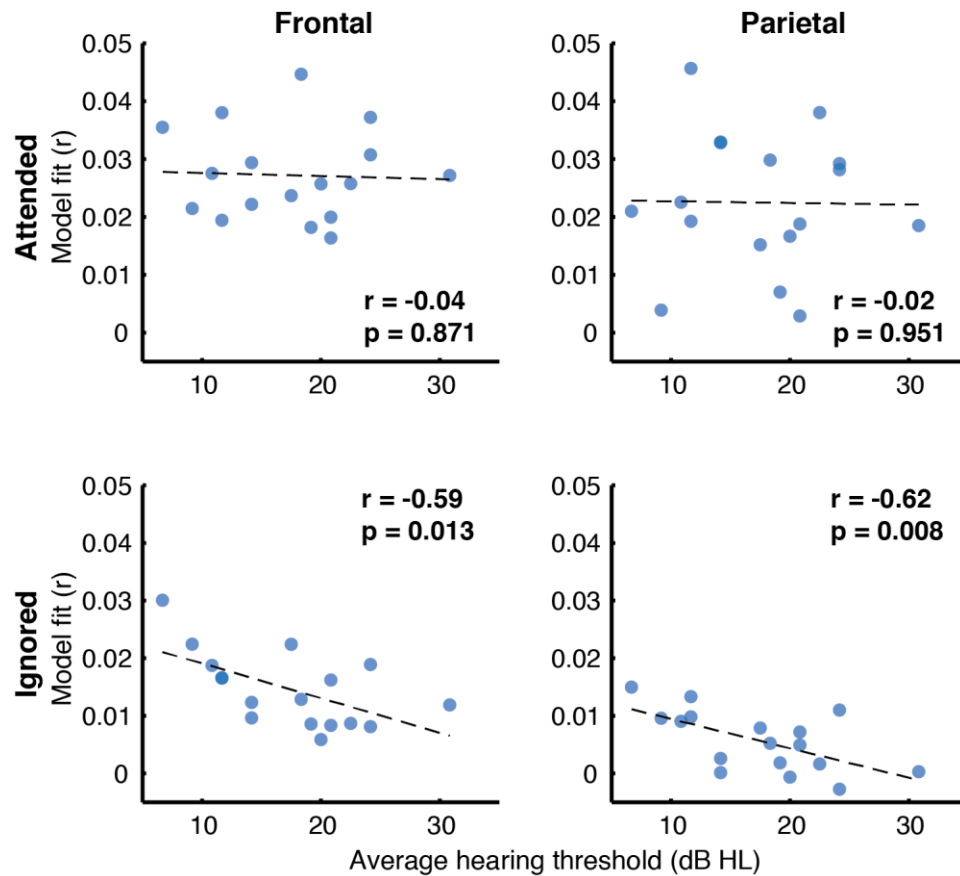

772

773

Figure 11. Scatterplots of average high-frequency hearing thresholds (2-8 kHz) and overall model goodness-of-fit as a function of attention (panel rows) and ROI (panel columns).

774

775

776

#### 4. Discussion

777

778

779

780

781

782

783

784

785

786

787

788

789

790

791

792

In the present study, we measured EEG responses to continuous two-talker speech mixtures in younger (< 40 y.o.) and older (> 40 y.o.) participants. Participants' cortical responses in the 1-8 Hz range were predicted by modeling TRFs for three speech features, short-timescale semantic dissimilarity, long-timescale lexical surprisal, and word-level audibility. We also collected behavioral measures, including participants' subjective ratings of their difficulties with

793 SIN understanding (modified SSQ), and comprehension scores for attended speech during the  
794 experiment and the associated confidence ratings.

795 Our three-feature model was able to explain significant variance in the EEG data,  
796 especially in responses to attended speech, where each of the features contributed to the  
797 neural responses (Fig. 4). The evidence for this was particularly strong for surprisal and  
798 audibility, suggesting that these model features captured stimulus characteristics that were  
799 actively tracked by our participants' auditory systems. Moreover, we found that participants'  
800 performance on the comprehension task (Fig. 7), as well as the associated confidence ratings,  
801 showed a trend towards a positive correlation with the goodness of the overall model fit for the  
802 attended speech, suggesting that successfully tracking these features is related to speech  
803 comprehension. Although our data does not support a strong association between  
804 performance and model contributions, or TRF magnitudes, for any one of the model features,  
805 we did find trends towards an association between word audibility and performance in both  
806 ROIs (for both model fit contributions, and TRF magnitudes), and in the frontal region between  
807 the surprisal TRF magnitude and performance. Speculatively, these trends suggest that  
808 improved comprehension may be related to at least two cognitive processes. First, the  
809 association with audibility suggests that improved performance may stem from more effective  
810 weighing of word-level information by word reliability, as reflected by the word SNR. Second,  
811 the association with surprisal suggests that high performance may be related to increased  
812 sensitivity to lexical and/or semantic associations between different segments of speech.

813 Consistent with previous work on neural representations of two-talker speech (Ding and  
814 Simon, 2012; Mesgarani and Chang, 2012; Broderick et al., 2018; O'Sullivan et al., 2019) we  
815 found robust differences between responses to attended and ignored speech both in the  
816 goodness of model fits and the TRFs. In general, model fits were better for attended than  
817 ignored speech (Fig. 4) and the associated TRFs for attended speech showed complex, multi-  
818 peaked morphologies, whereas the responses to ignored speech were flatter and contained  
819 fewer prominent peaks (Fig. 3). Thus, our results indicate that responses to a speech mixture  
820 preferentially reflect attended speech, while representations of distractor speech are largely  
821 suppressed.

822 Comparisons of EEG responses between age groups revealed a complex pattern of age-  
823 related differences, captured particularly by model fit measures. Specifically, we found that  
824 older participants exhibited on average greater differences in feature-specific model-fit  
825 contributions between attended and ignored speech. This age effect was driven primarily by  
826 better fits for attended speech in the frontal ROI (see Fig. 4). Although to a weaker degree,  
827 these differences were mirrored in attended TRFs, in that older adults showed generally  
828 stronger TRF deflections from 0 compared to younger participants (Fig. 5). In most cases,  
829 however, these TRF differences did not reach statistical significance when controlling for false  
830 discovery rate, possibly due to nuisance factors such as inter-subject variability in cortical  
831 geometry, and/or inadequate sample size.

832 With respect to the modelled features, we found that surprisal and audibility both  
833 showed stronger frontal contributions in older adults, whereas parietal contributions were

834 relatively similar between the two groups. We speculate that the stronger fits in the frontal  
835 region in older adults may be indicative of heightened reliance in this group on both lexical  
836 prediction, as reflected by increased accuracy of surprisal fits, and on words with better  
837 audibility. Higher word SNRs may have been more important for disambiguation of the masked  
838 portions of speech for older compared to younger adults. Although audibility itself reflects a  
839 relatively low-level aspect of our stimuli, its frontal TRF profile showed a prolonged positive  
840 deflection in the 250-550 ms latency range. Such a long latency is consistent with the  
841 possibility that this audibility-related response may reflect engagement of higher-level  
842 processes, such as retrospective disambiguation, or prospective prediction.

843 It is notable that participants in the older group exhibited significantly better  
844 performance on the comprehension task than younger adults, despite having greater  
845 prevalence of hearing loss (15 out of 17 participants with HL were in the older group and the  
846 degree of HL was not significantly correlated with performance). This difference in performance  
847 difference complicates the interpretation of age-related differences in neural responses. It may  
848 be the case that older adults in our participant sample were either more engaged, or exerted  
849 greater effort in the task, which in turn led to stronger speech tracking in their EEG data, as well  
850 as better performance. This is plausible, since more participants in the older group (12/20 older  
851 vs 8/19 younger participants) indicated having a subjective sense of experiencing greater  
852 difficulty with SIN understanding compared to their peers. The sense of greater difficulty may  
853 have motivated at least some of the older participants to exert greater effort to perform well.  
854 However, while the average performance of participants with self-reported SIN difficulties was  
855 slightly better than that in participants who did not report such difficulties, these differences  
856 were not significant. Despite this, the possibility that differences between the two age groups in  
857 effort, attentiveness, or another factor may underlie the neural differences discussed above,  
858 deserves further attention in future work.

859

#### 860 **4.1 Relationship to existing work on age-effects on electrophysiological measures of speech** 861 **processing**

862

863 Several studies have examined effects of age (Presacco et al., 2016; Decruy et al., 2019; Zan et  
864 al., 2020) and hearing loss (Millman et al., 2017; Decruy et al., 2020) on continuous speech  
865 processing in the context of envelope tracking. Generally, these studies have demonstrated  
866 that older adults and those with hearing loss exhibit exaggerated cortical tracking of speech  
867 envelope both in quiet and in the presence of a competing speaker, as reflected by higher  
868 envelope reconstruction accuracies from delta-band EEG or MEG responses in these  
869 populations. Our analyses show a similar pattern of amplified feature tracking in the aging  
870 population, albeit for word-level features. Responses to the audibility feature, in particular, may  
871 reflect similar underlying processes as those involved in envelope processing. However,  
872 audibility in our study was defined as the word-by-word ratio between the acoustic energy in  
873 the two speech waveforms, rather than the absolute amplitude of each speech signal, making  
874 direct comparisons of the two measures difficult. Distinct from envelope TRFs, the audibility

875 TRF in our study contained prolonged deflections from 0 in the 300-500 ms latency range,  
876 suggesting that our measure may tap into additional higher-level processes. Although lexical  
877 surprisal is seemingly unrelated to speech envelope, it is possible that predictive processes may  
878 interact with lower-level stimulus encoding via feedback processes, as has been demonstrated  
879 for dissimilarity (Broderick et al., 2019).

880 While measures of envelope tracking have provided important insights into speech  
881 processing, they are largely uninformative about the nature of higher-level processes involved  
882 in speech perception. In recent years, an increasing number of studies have investigated the  
883 relationship of electrophysiologically-measured cortical responses to both intermediate speech  
884 representations such as those evoked by different phoneme categories (Di Liberto, 2015;  
885 Lesenfants, 2020; Teoh & Lalor, 2020; but cf. Daube et al. 2019) or phonotactics (Di Liberto,  
886 2019), and word-level representations related to lexical (e.g., Brodbeck et al., 2018), as well as  
887 syntactic and semantic (Broderick et al., 2018; Weissbart et al., 2019; Heilbron et al., 2019;  
888 Donhauser & Baillet, 2020) processing. Nevertheless, relatively little is known about how these  
889 representations change as a function of age, particularly in challenging listening conditions.  
890 Recently, Broderick et al. (2020) compared representations of semantic dissimilarity and 5-gram  
891 lexical surprisal derived from responses to clean speech in younger and older adults. They  
892 showed that although younger adults exhibited robust responses to each feature, older adults  
893 only showed strong responses to lexical surprisal (albeit with a delayed peak response), with a  
894 nearly absent response to semantic dissimilarity. These results were interpreted as potentially  
895 reflecting lesser reliance of older adults on semantic predictive process, thought to be captured  
896 by the dissimilarity feature, due to age-related cognitive decline. Consistent with this, older  
897 participants with greater semantic verbal fluency, a measure related to the ability to engage in  
898 semantic prediction, showed greater contribution of semantic dissimilarity to the model of  
899 cortical responses to speech.

900 Because our experimental design involved listening to a more challenging, two-speaker  
901 mixture, direct comparisons of our results with those of Broderick et al. (2020) are not possible.  
902 Nevertheless, there are marked differences between the patterns of results observed in their  
903 study compared to ours. In particular, we observed stronger tracking of both lexical surprisal  
904 and word audibility in older than younger adults, and generally weak but otherwise similar  
905 tracking of dissimilarity in the two groups. Notably, this was observed predominantly at the  
906 frontal ROI, with the posterior ROI showing a smaller difference (albeit in the same direction as  
907 the frontal results). In contrast, Broderick et al. focused their analyses on posterior electrode  
908 sites, making it unclear how tracking of their features behaved at more frontal sites that are  
909 involved in tasks relying on working memory (e.g., Gevins et al., 1997; Onton et al., 2005).

910 In Broderick et al. (2020), the greatest age-related differences were shown for semantic  
911 dissimilarity, whereas our goodness-of-fit results showed relatively weak contributions from  
912 this feature (compared to surprisal and word audibility) that did not differ significantly between  
913 the younger and older age groups. However, we did observe greater frontal TRF deflections in  
914 the older group for dissimilarity, with significant group differences around 250 and 600 ms,  
915 suggesting an increased gain for this feature in the older population. This underscores the

916 importance of analyzing both model fits and the corresponding TRFs, as morphological  
917 differences in the latter may be possible even in the absence of differences in the model  
918 goodness-of-fit. The most notable difference in our results with respect to dissimilarity is that  
919 we did not observe posterior N400 response in either group, in contrast to the significant  
920 parietal N400 in the TRF for dissimilarity in older but not younger adults reported by Broderick  
921 et al. Although this discrepancy is puzzling given the use of nearly identical methods for  
922 computing dissimilarity, it raises the possibility that the utility of dissimilarity may be limited if  
923 other features, which better capture neural responses that would otherwise be attributed to  
924 dissimilarity, are included in the model.

925 Another important difference between the two studies pertains to the role of surprisal  
926 in the models fitted to the data. Specifically, unlike the relatively simple 5-gram surprisal used  
927 by Broderick et al., which was intended to capture responses related to the knowledge of word  
928 co-occurrence within 5-word neighborhoods, the surprisal features utilized in our study were  
929 computed using an advanced natural language model (GPT-2; Radford et al., 2019) that uses  
930 preceding context of up to several hundred words (i.e., dozens of sentences) in order to  
931 estimate each upcoming word. As such, surprisal in our study likely captured responses related  
932 to higher-level lexical and/or syntactic predictions. Thus, although responses to these two  
933 surprisal measures cannot be directly compared, the stronger tracking of surprisal by older  
934 adults in our study is consistent with increased reliance on predictive processes in this  
935 population. This is in agreement with behavioral results demonstrating greater reliance on  
936 semantic context in populations with compromised representations of speech, such as those  
937 with hearing loss (Benichov et al., 2012; Lash et al., 2013) and cochlear implants (Amichetti et  
938 al., 2018; Dingemanse and Goedegebure, 2019; O'Neill et al., 2019).

939 Importantly, the seemingly conflicting pattern of results between these studies could in  
940 fact reflect two distinct contributors to speech perception difficulties in older adults, namely  
941 decreases in the fidelity of lower level representations, and cognitive decline. Prevalence of  
942 mild high-frequency hearing loss in our sample of older adults was quite high, making it likely  
943 that decreased fidelity of peripheral representations had an effect on our results. While  
944 Broderick et al. did not report audiogram measures for their sample of older adults, the mean  
945 age was considerably greater in their study (mean  $\pm$  s.d. = 63.9  $\pm$  6.7 years vs 53.5  $\pm$  8.7 years in  
946 this study), making it likely that similar or greater hearing difficulties may have impacted their  
947 participants. However, because of the age difference in the two samples, the effects of  
948 cognitive decline may have contributed more significantly to the results of Broderick et al., and  
949 may potentially explain why measures related to predictive processes showed opposite effects  
950 in the two studies. This exemplifies the complex combination of etiologies that may underlie  
951 speech perception difficulties, and the distinct ways in which they may affect speech  
952 processing. Future work should attempt to quantify these factors and use multivariate analyses  
953 to better characterize if and how they may relate to different neural measures of speech  
954 processing.

955  
956 **4.2 Higher-level speech feature tracking as an index of speech in noise perception difficulties**



957

958 A key reason for our choice to study responses to lexical and semantic features is their  
959 potentially greater sensitivity to SIN perception difficulties, compared to responses driven by  
960 lower-level features such as the speech envelope. Specifically, because dissimilarity and  
961 surprisal (but not audibility) depend on preceding lexical and semantic context, in order for  
962 language processing mechanisms to accurately track them, each word within the sequence  
963 needs to be recognized and integrated with the preceding context. Lower-level SIN processing  
964 impairments may thus disproportionately impact tracking of these features. This is because  
965 missing a given word may potentially distort neural computations of surprisal and lexical  
966 predictions for a large number of subsequent words. This distortion could result in a mismatch  
967 between the objectively computed sequences of these features (used in the model) and their  
968 internal estimates.

969 Dissimilarity, in particular, depends on local word context (limited to one sentence, in  
970 our model). Misperception of individual words may thus greatly distort the internal estimates  
971 of the semantic relationships between words within this short-term context, leading to poor  
972 correspondence with the objectively computed dissimilarity values. Spectrally degraded speech  
973 has previously been shown to elicit weaker N400 responses, and a reduced difference in N400  
974 between sentences with high and low cloze probabilities (Aydelott et al., 2006; Obleser and  
975 Kotz, 2011; Carey et al., 2014). Similarly, our results showed weak model contributions of  
976 dissimilarity with N400 responses essentially absent in the posterior ROI, consistent with the  
977 possibility that challenging listening scenarios may indeed disrupt representations related to  
978 relationships between words in a local context. Notably, however, we did not observe a reliable  
979 association between individual differences in the tracking of this feature, or the magnitude of  
980 N400, and performance on the comprehension task, the associated confidence measures, or  
981 the  $SSQ_m$ . As such, the magnitude of dissimilarity tracking, or the associated TRFs, may not  
982 actually reflect the degree of SIN perception difficulties, as we hypothesized it would. Thus, it is  
983 possible that weak tracking of dissimilarity in our study may reflect that dissimilarity, as  
984 computed here, is a relatively unimportant feature for characterizing cortical speech  
985 processing. Note that although our results appear to be at odds with Broderick et al. (2018),  
986 who demonstrated robust dissimilarity-related N400 responses for both clean and two-talker  
987 speech, that study used dissimilarity as the sole feature. It is, therefore, possible that their  
988 estimated TRFs may have captured contributions from other features time-locked to word  
989 onsets (e.g., ones related to lexical and syntactic processing). Indeed, in a recent reanalysis of  
990 cocktail party data from Broderick et al. (2018), Dijkstra et al. (2020) showed that replacing  
991 dissimilarity values in a regressor with unit-amplitude impulses leads to estimation of  
992 essentially identical TRFs to those obtained with the impulses scaled by dissimilarity features.  
993 This insensitivity to impulse scaling calls into question the extent to which said TRFs reflect  
994 dissimilarity-related processing. Comparisons of single-feature TRFs derived from our data using  
995 word onset and dissimilarity regressors (analyses not shown here) mirrored these observations,  
996 suggesting that the utility of dissimilarity in explaining EEG responses to continuous speech may  
997 be limited.

998           In contrast to dissimilarity, our observation of robust model contributions and posterior  
999 N400 responses for surprisal suggests that this feature may be relatively robust to challenging  
1000 listening scenarios. This may be the case because surprisal, as defined in the present study,  
1001 reflects predictability of each word given a multi-sentence preceding context (vs. single-  
1002 sentence context for dissimilarity), potentially making misperception of individual words have  
1003 relatively low impact on lexical predictions. In other words, failure to recognize individual words  
1004 may have a relatively small impact on the internal predictions, as these may be highly  
1005 constrained in natural speech by the successfully identified words within the longer-term  
1006 context. Admittedly, the apparent robustness of surprisal to adverse listening conditions may  
1007 be specific to longer narratives where long-term semantic dependencies exist, such as  
1008 audiobooks used in our study. In contrast to dissimilarity, we did observe weak trends  
1009 suggesting an association between the amplitude of the surprisal TRF in the N400 latency  
1010 range, and the performance on the comprehension questions. As such, it is possible that  
1011 surprisal responses may indeed reflect the extent of SIN perception difficulties. However,  
1012 because these trends were not statistically robust to multiple-comparisons correction, and  
1013 because similar trends were not observed for SSQ<sub>m</sub>, it remains unclear if this neuro-behavioral  
1014 association is reliable. A replication study with a larger sample size, improved EEG denoising  
1015 algorithms, and/or more sensitive behavioral measures may be needed to further explore this  
1016 link.

1017           It is notable that the correlations between SSQ<sub>m</sub> or task performance and feature-  
1018 specific model contributions were overall relatively weak in this study. Although this implies  
1019 that none of the features utilized in our study can on their own predict the degree of SIN  
1020 perception difficulties, it is possible that such deficits may be better characterized in terms of a  
1021 multi-dimensional pattern of feature-specific neural responses. In other words, it may be the  
1022 case that in order to predict the extent of SIN perception difficulties, a combination of neural  
1023 measures across multiple lower- and higher-level speech features needs to be taken into  
1024 account. Along these lines, Lesenfants et al. (2019) showed that speech reception thresholds  
1025 can be predicted from EEG responses to speech more accurately using a model that contains  
1026 both spectrogram and phonetic features, compared to models containing only one of the  
1027 features. Furthermore, because SIN perception difficulties can have different underlying  
1028 etiologies, with different relative contributions from peripheral damage and cognitive factors, it  
1029 may be the case that distinct patterns of feature-specific responses characterize different  
1030 underlying causes of SIN deficits.

1031

### 1032 **4.3 Behavioral correlates of self-reported SIN difficulties**

1033

1034 Our data revealed a trend towards a negative association between SSQ<sub>m</sub> and the overall model  
1035 goodness-of-fit for attended speech. This is not surprising, as higher SSQ<sub>m</sub> scores reflect greater  
1036 subjective difficulty with SIN perception, which would be expected to be related to poorer  
1037 tracking of attended speech in the presence of competing speech. However, we found no  
1038 correlation between SSQ<sub>m</sub> and performance on the comprehension task ( $r = -0.17$ ,  $p = 0.29$ ),

1039 suggesting that even participants with potentially more deteriorated representations of  
1040 attended speech had sufficient fidelity of speech representations to achieve high task  
1041 performance. The lack of a relationship between subjective SIN perception difficulties and  
1042 performance is unintuitive, but mirrors similar results showing only a weak relationship  
1043 between subjective and objective measures of SIN difficulties (Phatak et al., 2018; Smith et al.,  
1044 2019).

1045 While statistical associations between subjective and objective measures of speech  
1046 perception have generally been poor in past work, it is possible that these outcomes are a  
1047 result of insufficiently sensitive methods for measuring speech perception. Specifically, typically  
1048 used methods for objectively measuring speech perception involve presentations of isolated  
1049 sentences, and having participants repeat them back, usually without time constraints (i.e.,  
1050 allowing participants to deliberate and piece together their percept). While these measures are  
1051 simple and effective in measuring speech perception deficits in populations with moderate and  
1052 severe hearing loss (e.g., Phatak et al., 2018), the external validity of these measures may be  
1053 limited at best, as they do not reflect real-world listening scenarios. Specifically, real-world  
1054 spoken communication generally requires real-time comprehension of complex, multi-sentence  
1055 expressions embedded in noisy and reverberant backgrounds, in order to allow for continuous  
1056 flow of interaction. Unlike the commonly used speech understanding tasks, these realistic  
1057 scenarios allow little time for deliberation about individual words, as new information is  
1058 continuous, creating the possibility of falling behind if speech processing is impaired or slowed.  
1059 Indeed, Xia et al. (2017) demonstrated marked differences in performance between tasks  
1060 involving simple word identification and answering comprehension questions about the  
1061 content of narrative stories, with the latter showing a weaker benefit from hearing aids. This  
1062 highlights the possibility that traditional speech recognition tasks may indeed be missing  
1063 important, behaviorally relevant aspects of speech perception.

1064 In the present study, a continuous multi-talker design with a behavioral task focused on  
1065 assessing comprehension was selected in an attempt to mimic some aspects of real-world  
1066 speech perception scenarios. Nevertheless, there were important differences that may have  
1067 contributed to our failure to detect a relationship between subjective SIN perception difficulty  
1068 (reflected in  $SSQ_m$ ) and behavioral performance. First, although we utilized co-located target  
1069 and distractor speakers, which are generally more challenging to parse out than spatially-  
1070 separated speakers (Marrone et al., 2008; Kidd et al., 2010), their fixed location, predictable  
1071 temporal characteristics (e.g., lack of sudden offsets and onsets in speaking), and relatively  
1072 monotone speaking styles likely facilitated participants' ability to suppress unwanted  
1073 processing of the ignored speaker. In contrast, realistic conversational settings such as  
1074 restaurants or bars generally contain distractor signals that vary less predictably in location,  
1075 intensity, emotional content, and other characteristics, likely contributing to greater distraction  
1076 and informational masking. It is possible that suppression of these types of distractor  
1077 information becomes impaired with age due to deterioration of attentional and other cognitive  
1078 resources. Second, although we attempted to quantify comprehension, as opposed to mere  
1079 word identification, of the content spoken by the target speaker via multiple-choice questions,

1080 it is possible that the implementation of this task lacked sensitivity to detect speech  
1081 comprehension deficits. Specifically, the fact that the target story spanned many minutes may  
1082 have allowed the participants to utilize much longer semantic context to aid the interpretation  
1083 of incoming information, compared to real-world interactions where topics often change more  
1084 rapidly. This was compounded by the fact that, for practical purposes, the questions were  
1085 framed in a Yes/No format, only requiring participants to identify the more likely of the two  
1086 options, rather than to demonstrate their own understanding of the story. While the main  
1087 purpose of the comprehension questions was to verify that participants followed the task  
1088 instructions, future work should take steps towards optimizing behavioral measures of  
1089 comprehension. For example, questions carefully calibrated to require roughly constant reading  
1090 time could be used to measure reaction times in addition to mere percent correct measures,  
1091 possibly revealing significant response delays in people with self-reported SIN difficulties.

1092

#### 1093 **4.4 Limitations**

1094

1095 Although our work provides evidence of age-related differences in cortical tracking of word-  
1096 level features, a notable limitation of our method is that it does not establish the source of this  
1097 difference. Specifically, it is unclear from our data if the distinct patterns of feature-tracking  
1098 were a result of higher-order linguistic mechanisms receiving inputs with differing fidelities  
1099 from lower-level processes, or they reflected age-related changes in the higher-order  
1100 mechanisms themselves, or some combination of the two. Furthermore, differential  
1101 engagement in cognitive resources (e.g., due to differential effort) may also have contributed to  
1102 the observed differences, even in the absence of actual changes in the underlying mechanisms.  
1103 Thus, an important goal for future work is to characterize speech representations more  
1104 thoroughly at multiple levels of the processing hierarchy in order to elucidate the mechanisms  
1105 implicated in the differences in speech processing. Furthermore, the measurement of speech  
1106 representations at multiple stages of the language processing hierarchy may be critical for  
1107 explaining individual differences in speech perception performance, and subjective measures  
1108 such as the SSQ<sub>m</sub>.

1109 The use of artificial neural networks (ANNs) to extract abstract features related to lexical  
1110 and semantic content of speech has become increasingly common in studies of language  
1111 processing (Huth et al., 2016; Broderick et al., 2018; Weissbart et al., 2019; Donhauser and  
1112 Baillet, 2020). While powerful in characterizing brain responses to speech, an important  
1113 limitation in the use of these features is that it can be difficult to interpret what aspects of  
1114 language they actually capture. Specifically, ANNs are usually trained on a task such as text  
1115 prediction on the basis of preceding context, and as such, ANNs may utilize any number of  
1116 statistical regularities in the training corpus in order to optimize their performance. Thus,  
1117 depending on the ANN architecture, aspects of language including the syntactic structure,  
1118 lexical frequency, semantic relationships, and others may all contribute to the performance of  
1119 ANNs. Without knowing the language aspects learned by ANNs, it is difficult, and may be even  
1120 impossible, to parse out the relative contributions of the different variables. Consequently,

1121 when cortical responses are found to track these features, as is the case in the present study, it  
1122 may remain unclear what linguistic processes underlie this tracking. Thus, improving the  
1123 interpretability of neural analyses that utilize complex natural language models remains an  
1124 important challenge for future work.

1125

## 1126 **5 Conclusions**

1127

1128 The present study extends upon the existing body of work demonstrating the plausibility of  
1129 measuring cortical tracking of high-level features related to speech meaning and predictability.  
1130 The results show evidence of age-related amplification in tracking of these features in  
1131 competing speech streams. Moreover, our exploratory analyses showed trends of correlations  
1132 between these measures and behavioral measures including comprehension performance and  
1133 subjective SIN perception difficulty scores, indicating their potential behavioral relevance.  
1134 Taken together, our work demonstrates the utility of modeling cortical responses to multi-  
1135 talker speech using complex, word-level features and the potential for their use to study  
1136 changes in speech processing due to aging and hearing loss.

1137

## 1138 **Data availability**

1139

1140 Data is not available publicly, as data sharing was not a part of the informed consent. Requests  
1141 to access the dataset should be directed to JM ([mesik002@umn.edu](mailto:mesik002@umn.edu)).

1142

## 1143 **Ethics statement**

1144

1145 The Institutional Review Board of the University of Minnesota approved the procedures in this  
1146 study. All participants provided written informed consent to participate.

1147

## 1148 **Author contributions**

1149

1150 JM and MW designed the experiment, analyzed the data, and wrote the manuscript. JM and  
1151 LAR implemented experimental procedures and collected the data. All authors commented on  
1152 the manuscript and approved the submitted version.

1153

## 1154 **Funding**

1155

1156 Financial support for this work was provided by NIH grant R01 DC015462 to MW. The work of  
1157 LAR was supported by the NSF REU grant 1757390.

1158

## 1159 **Acknowledgments**

1160

1161 We thank Brian Simensen and Franciska Hauer for help with data collection, PuiYii Goh for help  
1162 with data analysis, Hao Lu for help with initial setup of NLP libraries, Erin O’Neill for help with  
1163 designing the modified SSQ questionnaire, and Emily Allen for help with graphic design and  
1164 post-processing of figures.

1165

### 1166 **Conflict of Interest Statement**

1167

1168 The authors declare no conflicts of interest.

1169

### 1170 **References**

1171

1172 Akeroyd, M. A. (2008). Are individual differences in speech reception related to individual  
1173 differences in cognitive ability? A survey of twenty experimental studies with normal and  
1174 hearing-impaired adults. *Int. J. Audiol.* 47. doi:10.1080/14992020802301142.

1175 Amichetti, N. M., Atagi, E., Kong, Y.-Y., and Wingfield, A. (2018). Linguistic context versus  
1176 semantic competition in word recognition by younger and older adults with cochlear  
1177 implants. *Ear Hear.* 39, 101–109. doi:10.1097/AUD.0000000000000469.

1178 Aydelott, J., Dick, F., and Mills, D. L. (2006). Effects of acoustic distortion and semantic context  
1179 on event-related potentials to spoken words. *Psychophysiology* 43, 454–464.  
1180 doi:10.1111/j.1469-8986.2006.00448.x.

1181 Bell, A. J., and Sejnowski, T. J. (1995). Blind separation and blind deconvolution: an information-  
1182 theoretic approach. *ICASSP, IEEE Int. Conf. Acoust. Speech Signal Process. - Proc.* 5, 3415–  
1183 3418. doi:10.1109/icassp.1995.479719.

1184 Benichov, J., Cox, L. C., Tun, P. A., and Wingfield, A. (2012). Word recognition within a linguistic  
1185 context: effects of age, hearing acuity, verbal ability, and cognitive function. *Ear Hear.* 33,  
1186 250–256. doi:10.1097/AUD.0b013e31822f680f.

1187 Benjamini, Y., and Hochberg, Y. (1995). Controlling the false discovery rate: a practical and  
1188 powerful approach to multiple testing. *J. R. Stat. Soc. Ser. B* 57, 289–300.  
1189 doi:10.1111/j.2517-6161.1995.tb02031.x.

1190 Bigdely-Shamlo, N., Mullen, T., Kothe, C., Su, K.-M., and Robbins, K. A. (2015). The PREP  
1191 pipeline: standardized preprocessing for large-scale EEG analysis. *Front. Neuroinform.* 9, 1–  
1192 20. doi:10.3389/fninf.2015.00016.

1193 Brainard, D. H. (1997). The psychophysics toolbox. *Spat. Vis.* 10, 433–436.  
1194 doi:10.1163/156856897X00357.

1195 Brodbeck, C., Hong, L. E., and Simon, J. Z. (2018). Rapid transformation from auditory to  
1196 linguistic representations of continuous speech. *Curr. Biol.* 28, 3976–3983.e5.  
1197 doi:10.1016/j.cub.2018.10.042.

1198 Broderick, M. P., Anderson, A. J., Di Liberto, G. M., Crosse, M. J., and Lalor, E. C. (2018).  
1199 Electrophysiological correlates of semantic dissimilarity reflect the comprehension of  
1200 natural, narrative speech. *Curr. Biol.* 28, 803–809.e3. doi:10.1016/j.cub.2018.01.080.

1201 Broderick, M. P., Anderson, A. J., and Lalor, E. C. (2019). Semantic context enhances the early  
1202 auditory encoding of natural speech. *J. Neurosci.* 39, 7564–7575.  
1203 doi:10.1523/JNEUROSCI.0584-19.2019.

- 1204 Broderick, M. P., Liberto, G. M. Di, Anderson, A. J., Rofes, A., and Lalor, E. C. (2020). Dissociable  
1205 electrophysiological measures of natural language processing reveal differences in speech  
1206 comprehension strategy in healthy ageing. *bioRxiv*, 1–17. Available at:  
1207 <https://www.biorxiv.org/content/10.1101/2020.04.17.046201v1.full.pdf>.
- 1208 Carey, D., Mercure, E., Pizzioli, F., and Aydelott, J. (2014). Auditory semantic processing in  
1209 dichotic listening: effects of competing speech, ear of presentation, and sentential bias on  
1210 N400s to spoken words in context. *Neuropsychologia* 65, 102–112.  
1211 doi:10.1016/j.neuropsychologia.2014.10.016.
- 1212 Chia, E. M., Wang, J. J., Roctchina, E., Cumming, R. R., Newall, P., and Mitchell, P. (2007).  
1213 Hearing impairment and health-related quality of life: the blue mountains hearing study.  
1214 *Ear Hear.* 28, 187–195. doi:10.1097/AUD.0b013e31803126b6.
- 1215 Comon, P. (1994). Independent component analysis, a new concept? *Signal Processing* 36, 287–  
1216 314. doi:10.1016/0165-1684(94)90029-9.
- 1217 Crosse, M. J., Di Liberto, G. M., Bednar, A., and Lalor, E. C. (2016). The multivariate temporal  
1218 response function (mTRF) toolbox: A MATLAB toolbox for relating neural signals to  
1219 continuous stimuli. *Front. Hum. Neurosci.* 10, 1–14. doi:10.3389/fnhum.2016.00604.
- 1220 Dalton, D. S., Cruickshanks, K. J., Klein, B. E. K., Klein, R., Wiley, T. L., and Nondahl, D. M. (2003).  
1221 The impact of hearing loss on quality of life in older adults. *Gerontologist* 43, 661–668.  
1222 doi:10.1093/geront/43.5.661.
- 1223 Decruy, L., Vanthornhout, J., and Francart, T. (2019). Evidence for enhanced neural tracking of  
1224 the speech envelope underlying age-related speech-in-noise difficulties. *J. Neurophysiol.*  
1225 122, 601–615. doi:10.1152/jn.00687.2018.
- 1226 Decruy, L., Vanthornhout, J., and Francart, T. (2020). Hearing impairment is associated with  
1227 enhanced neural tracking of the speech envelope. *Hear. Res.* 393, 107961.  
1228 doi:10.1016/j.heares.2020.107961.
- 1229 Delorme, A., and Makeig, S. (2004). EEGLAB: an open source toolbox for analysis of single-trial  
1230 EEG dynamics including independent component analysis. *J. Neurosci. Methods* 134, 9–21.  
1231 doi:10.1016/j.jneumeth.2003.10.009.
- 1232 Dijkstra, K., Desain, P., and Farquhar, J. (2020). Exploiting electrophysiological measures of  
1233 semantic processing for auditory attention decoding. *bioRxiv*.  
1234 doi:10.1101/2020.04.17.046813.
- 1235 Ding, N., and Simon, J. Z. (2012). Emergence of neural encoding of auditory objects while  
1236 listening to competing speakers. *Proc. Natl. Acad. Sci.* 109, 11854–11859.  
1237 doi:10.1073/pnas.1205381109.
- 1238 Dingemans, J. G., and Goedegebure, A. (2019). The important role of contextual information in  
1239 speech perception in cochlear implant users and its consequences in speech tests. *Trends*  
1240 *Hear.* 23, 233121651983867. doi:10.1177/2331216519838672.
- 1241 Donhauser, P. W., and Baillet, S. (2020). Two distinct neural timescales for predictive speech  
1242 processing. *Neuron* 105, 385–393.e9. doi:10.1016/j.neuron.2019.10.019.
- 1243 Dryden, A., Allen, H. A., Henshaw, H., and Heinrich, A. (2017). The association between  
1244 cognitive performance and speech-in-noise perception for adult listeners: a systematic  
1245 literature review and meta-analysis. *Trends Hear.* 21, 1–21.  
1246 doi:10.1177/2331216517744675.
- 1247 Dubno, J. R., Dirks, D. D., and Morgan, D. E. (1984). Effects of age and mild hearing loss on

- 1248 speech recognition in noise. *J. Acoust. Soc. Am.* 76, 87–96. doi:10.1121/1.391011.
- 1249 Fiedler, L., Wöstmann, M., Herbst, S. K., and Obleser, J. (2019). Late cortical tracking of ignored  
1250 speech facilitates neural selectivity in acoustically challenging conditions. *Neuroimage* 186,  
1251 33–42. doi:10.1016/j.neuroimage.2018.10.057.
- 1252 Fogerty, D., Ahlstrom, J. B., Bologna, W. J., and Dubno, J. R. (2015). Sentence intelligibility  
1253 during segmental interruption and masking by speech-modulated noise: effects of age and  
1254 hearing loss. *J. Acoust. Soc. Am.* 137, 3487–3501. doi:10.1121/1.4921603.
- 1255 Fogerty, D., Madorskiy, R., Ahlstrom, J. B., and Dubno, J. R. (2020). Comparing speech  
1256 recognition for listeners with normal and impaired hearing: simulations for controlling  
1257 differences in speech levels and spectral shape. *J. Speech, Lang. Hear. Res.*, 1–11.  
1258 doi:10.1044/2020\_JSLHR-20-00246.
- 1259 Fowler, E. P. (1936). A method for the early detection of otosclerosis: a study of sounds well  
1260 above threshold. *Arch. Otolaryngol. - Head Neck Surg.* 24, 731–741.  
1261 doi:10.1001/archotol.1936.00640050746005.
- 1262 Gatehouse, S., and Noble, I. (2004). The speech, spatial and qualities of hearing scale (ssq). *Int.*  
1263 *J. Audiol.* 43, 85–99. doi:10.1080/14992020400050014.
- 1264 Gevins, A., Smith, M. E., McEvoy, L., and Yu, D. (1997). High-resolution EEG mapping of cortical  
1265 activation related to working memory: effects of task difficulty, type of processing, and  
1266 practice. *Cereb. Cortex* 7, 374–385. doi:10.1093/cercor/7.4.374.
- 1267 Goossens, T., Vercammen, C., Wouters, J., and van Wieringen, A. (2017). Masked speech  
1268 perception across the adult lifespan: impact of age and hearing impairment. *Hear. Res.*  
1269 344, 109–124. doi:10.1016/j.heares.2016.11.004.
- 1270 Heilbron, M., Ehinger, B., Hagoort, P., and de Lange, F. (2019). Tracking naturalistic linguistic  
1271 predictions with deep neural language models. in *2019 Conference on Cognitive*  
1272 *Computational Neuroscience* (Brentwood, Tennessee, USA: Cognitive Computational  
1273 Neuroscience), 424–427. doi:10.32470/CCN.2019.1096-0.
- 1274 Helfer, K. S., and Wilber, L. A. (1990). Hearing loss, aging, and speech perception in  
1275 reverberation and noise. *J. Speech Hear. Res.* 33, 149–155. doi:10.1044/jshr.3301.149.
- 1276 Huang, Q., and Tang, J. (2010). Age-related hearing loss or presbycusis. *Eur. Arch. Oto-Rhino-*  
1277 *Laryngology* 267, 1179–1191. doi:10.1007/s00405-010-1270-7.
- 1278 Huth, A. G., De Heer, W. A., Griffiths, T. L., Theunissen, F. E., and Gallant, J. L. (2016). Natural  
1279 speech reveals the semantic maps that tile human cerebral cortex. *Nature* 532, 453–458.  
1280 doi:10.1038/nature17637.
- 1281 Jutten, C., and Herault, J. (1991). Blind separation of sources, part i: an adaptive algorithm  
1282 based on neuromimetic architecture. *Signal Processing* 24, 1–10. doi:10.1016/0165-  
1283 1684(91)90079-X.
- 1284 Kidd, G., Mason, C. R., Best, V., and Marrone, N. (2010). Stimulus factors influencing spatial  
1285 release from speech-on-speech masking. *J. Acoust. Soc. Am.* 128, 1965–1978.  
1286 doi:10.1121/1.3478781.
- 1287 Killion, M. C., Niquette, P. A., Gudmundsen, G. I., Revit, L. J., and Banerjee, S. (2004).  
1288 Development of a quick speech-in-noise test for measuring signal-to-noise ratio loss in  
1289 normal-hearing and hearing-impaired listeners. *J. Acoust. Soc. Am.* 116, 2395–2405.  
1290 doi:10.1121/1.1784440.
- 1291 Kleiner, M., Brainard, D. H., and Pelli, D. G. (2007). What’s new in Psychtoolbox-3. in *Perception*



- 1292 36 *ECVP Abstract Supplement*.
- 1293 Klem, G. H., Lüders, H. O., Jasper, H. H., and Elger, C. (1999). The ten-twenty electrode system  
1294 of the international federation. the international federation of clinical neurophysiology.  
1295 *Electroencephalogr. Clin. Neurophysiol. Suppl.* 52, 3–6. Available at:  
1296 <http://www.ncbi.nlm.nih.gov/pubmed/10590970>.
- 1297 Kong, Y. Y., Mullangi, A., and Ding, N. (2014). Differential modulation of auditory responses to  
1298 attended and unattended speech in different listening conditions. *Hear. Res.* 316, 73–81.  
1299 doi:10.1016/j.heares.2014.07.009.
- 1300 Kutas, M., and Hillyard, S. (1980). Reading senseless sentences: brain potentials reflect semantic  
1301 incongruity. *Science* 207, 203–205. doi:10.1126/science.7350657.
- 1302 Kutas, M., and Hillyard, S. A. (1984). Brain potentials during reading reflect word expectancy  
1303 and semantic association. *Nature* 307, 161–3. doi:10.1038/307161a0.
- 1304 Lalor, E. C., and Foxe, J. J. (2010). Neural responses to uninterrupted natural speech can be  
1305 extracted with precise temporal resolution. *Eur. J. Neurosci.* 31, 189–193.  
1306 doi:10.1111/j.1460-9568.2009.07055.x.
- 1307 Lash, A., Rogers, C. S., Zoller, A., and Wingfield, A. (2013). Expectation and entropy in spoken  
1308 word recognition: effects of age and hearing acuity. *Exp. Aging Res.* 39, 235–253.  
1309 doi:10.1080/0361073X.2013.779175.
- 1310 Lesenfants, D., Vanthornhout, J., Verschueren, E., Decruy, L., and Francart, T. (2019). Predicting  
1311 individual speech intelligibility from the neural tracking of acoustic- and phonetic-level  
1312 speech representations. *Hear. Res.* 380, accepted. doi:10.1101/471367.
- 1313 Loughrey, D. G., Kelly, M. E., Kelley, G. A., Brennan, S., and Lawlor, B. A. (2018). Association of  
1314 age-related hearing loss with cognitive function, cognitive impairment, and dementia a  
1315 systematic review and meta-analysis. *JAMA Otolaryngol. - Head Neck Surg.* 144, 115–126.  
1316 doi:10.1001/jamaoto.2017.2513.
- 1317 Marrone, N., Mason, C. R., and Kidd, G. (2008). The effects of hearing loss and age on the  
1318 benefit of spatial separation between multiple talkers in reverberant rooms. *J. Acoust. Soc.*  
1319 *Am.* 124, 3064–3075. doi:10.1121/1.2980441.
- 1320 McAuliffe, M., Socolof, M., Mihuc, S., Wagner, M., and Sonderegger, M. (2017). Montreal  
1321 forced aligner: trainable text-speech alignment using kald. *Proc. Annu. Conf. Int. Speech*  
1322 *Commun. Assoc. INTERSPEECH 2017-Augus*, 498–502. doi:10.21437/Interspeech.2017-  
1323 1386.
- 1324 Mesgarani, N., and Chang, E. F. (2012). Selective cortical representation of attended speaker in  
1325 multi-talker speech perception. *Nature* 485, 233–236. doi:10.1038/nature11020.
- 1326 Mick, P., Kawachi, I., and Lin, F. R. (2014). The association between hearing loss and social  
1327 isolation in older adults. *Otolaryngol. Neck Surg.* 150, 378–384.  
1328 doi:10.1177/0194599813518021.
- 1329 Mikolov, T., Chen, K., Corrado, G., and Dean, J. (2013a). Efficient estimation of word  
1330 representations in vector space. *arXiv*. Available at: <http://arxiv.org/abs/1301.3781>.
- 1331 Mikolov, T., Sutskever, I., Chen, K., Corrado, G., and Dean, J. (2013b). Distributed  
1332 representations of words and phrases and their compositionality. in *NIPS*.
- 1333 Millman, R. E., Mattys, S. L., Gouws, A. D., and Prendergast, G. (2017). Magnified neural  
1334 envelope coding predicts deficits in speech perception in noise. *J. Neurosci.* 37, 7727–  
1335 7736. doi:10.1523/JNEUROSCI.2722-16.2017.

- 1336 O'Neill, E. R., Kreft, H. A., and Oxenham, A. J. (2019). Cognitive factors contribute to speech  
1337 perception in cochlear-implant users and age-matched normal-hearing listeners under  
1338 vocoded conditions. *J. Acoust. Soc. Am.* 146, 195–210. doi:10.1121/1.5116009.
- 1339 O'Sullivan, J. A., Herrero, J., Smith, E., Sheth, S. A., Mehta, A. D., Mesgarani, N., et al. (2019).  
1340 Hierarchical encoding of attended auditory objects in multi-talker speech perception  
1341 article hierarchical encoding of attended auditory objects in multi-talker speech  
1342 perception. *Neuron*, 1–15. doi:10.1016/j.neuron.2019.09.007.
- 1343 Obleser, J., and Kotz, S. A. (2011). Multiple brain signatures of integration in the comprehension  
1344 of degraded speech. *Neuroimage* 55, 713–723. doi:10.1016/j.neuroimage.2010.12.020.
- 1345 Onton, J., Delorme, A., and Makeig, S. (2005). Frontal midline EEG dynamics during working  
1346 memory. *Neuroimage* 27, 341–356. doi:10.1016/j.neuroimage.2005.04.014.
- 1347 Paszke, A., Gross, S., Massa, F., Lerer, A., Bradbury, J., Chanan, G., et al. (2019). PyTorch: an  
1348 imperative style, high-performance deep learning library. in *Advances in Neural*  
1349 *Information Processing Systems*, 8026–8037. Available at:  
1350 <https://papers.nips.cc/paper/2019/file/bdbca288fee7f92f2bfa9f7012727740-Paper.pdf>.
- 1351 Pelli, D. G. (1997). The videotoolbox software for visual psychophysics: transforming numbers  
1352 into movies. *Spat. Vis.* 10, 437–442. doi:10.1163/156856897X00366.
- 1353 Phatak, S. A., Sheffield, B. M., Brungart, D. S., and Grant, K. W. (2018). Development of a test  
1354 battery for evaluating speech perception in complex listening environments: effects of  
1355 sensorineural hearing loss. *Ear Hear.* 39, 449–456. doi:10.1097/AUD.0000000000000567.
- 1356 Pickering, M. J., and Gambi, C. (2018). Predicting while comprehending language: a theory and  
1357 review. *Psychol. Bull.* 144, 1002–1044. doi:10.1037/bul0000158.
- 1358 Power, A. J., Foxe, J. J., Forde, E.-J., Reilly, R. B., and Lalor, E. C. (2012). At what time is the  
1359 cocktail party? a late locus of selective attention to natural speech. *Eur. J. Neurosci.* 35,  
1360 1497–1503. doi:10.1111/j.1460-9568.2012.08060.x.
- 1361 Presacco, A., Simon, J. Z., and Anderson, S. (2016). Evidence of degraded representation of  
1362 speech in noise, in the aging midbrain and cortex. *J. Neurophysiol.* 116, 2346–2355.  
1363 doi:10.1152/jn.00372.2016.
- 1364 Pronk, M., Deeg, D. J. H., Smits, C., Twisk, J. W., Van Tilburg, T. G., Festen, J. M., et al. (2014).  
1365 Hearing loss in older persons: does the rate of decline affect psychosocial health? *J. Aging*  
1366 *Health* 26, 703–723. doi:10.1177/0898264314529329.
- 1367 Radford, A., Wu, J., Child, R., Luan, D., Amodei, D., and Sutskever, I. (2019). Language models  
1368 are unsupervised multitask learners. *OpenAI Blog*. Available at:  
1369 [https://cdn.openai.com/better-language-](https://cdn.openai.com/better-language-models/language_models_are_unsupervised_multitask_learners.pdf)  
1370 [models/language\\_models\\_are\\_unsupervised\\_multitask\\_learners.pdf](https://cdn.openai.com/better-language-models/language_models_are_unsupervised_multitask_learners.pdf).
- 1371 Ray, J., Popli, G., and Fell, G. (2018). Association of cognition and age-related hearing  
1372 impairment in the english longitudinal study of ageing. *JAMA Otolaryngol. - Head Neck*  
1373 *Surg.* 144, 876–882. doi:10.1001/jamaoto.2018.1656.
- 1374 Rehurek, R., and Sojka, P. (2010). Software framework for topic modelling with large corpora. in  
1375 *Proceedings of the LREC 2010 Workshop on New Challenges for NLP Frameworks*, 45–50.  
1376 Available at: <https://www.fi.muni.cz/usr/sojka/papers/lrec2010-rehurek-sojka.pdf>.
- 1377 Saunders, G. H. (1989). Determinants of objective and subjective auditory disability in patients  
1378 with normal hearing. Available at: <http://eprints.nottingham.ac.uk/id/eprint/12959>.
- 1379 Smith, S. B., Krizman, J., Liu, C., White-Schwoch, T., Nicol, T., and Kraus, N. (2019). Investigating

1380 peripheral sources of speech-in-noise variability in listeners with normal audiograms. *Hear.*  
 1381 *Res.* 371, 66–74. doi:10.1016/j.heares.2018.11.008.

1382 Steinberg, J. C., and Gardner, M. B. (1937). The dependence of hearing impairment on sound  
 1383 intensity. *J. Acoust. Soc. Am.* 9, 11–23. doi:10.1121/1.1915905.

1384 Tremblay, K. L., Pinto, A., Fischer, M. E., Klein, B. E. K., Klein, R., Levy, S., et al. (2015). Self-  
 1385 reported hearing difficulties among adults with normal audiograms: the beaver dam  
 1386 offspring study. *Ear Hear.* 36, e290–e299. doi:10.1097/AUD.000000000000195.

1387 van Rooij, J. C. G. M., and Plomp, R. (1990). Auditive and cognitive factors in speech perception  
 1388 by elderly listeners. ii: multivariate analyses. *J. Acoust. Soc. Am.* 88, 2611–2624.  
 1389 doi:10.1121/1.399981.

1390 Vaswani, A., Shazeer, N., Parmar, N., Uszkoreit, J., Jones, L., Gomez, A. N., et al. (2017).  
 1391 Attention is all you need. in *NIPS* Available at: <http://arxiv.org/abs/1706.03762>.

1392 Weissbart, H., Kandylaki, K. D., and Reichenbach, T. (2019). Cortical tracking of surprisal during  
 1393 continuous speech comprehension. *J. Cogn. Neurosci.*, 1–12. doi:10.1162/jocn\_a\_01467.

1394 Wolf, T., Debut, L., Sanh, V., Chaumond, J., Delangue, C., Moi, A., et al. (2020). Transformers :  
 1395 state-of-the-art natural language processing. in *Proceedings of the 2020 Conference on*  
 1396 *Empirical Methods in Natural Language Processing: System Demonstrations*, 38–45.  
 1397 Available at: <https://www.aclweb.org/anthology/2020.emnlp-demos.6.pdf>.

1398 Xia, J., Kalluri, S., Micheyl, C., and Hafter, E. (2017). Continued search for better prediction of  
 1399 aided speech understanding in multi-talker environments. *J. Acoust. Soc. Am.* 142, 2386–  
 1400 2399. doi:10.1121/1.5008498.

1401 Yamasoba, T., Lin, F. R., Someya, S., Kashio, A., Sakamoto, T., and Kondo, K. (2013). Current  
 1402 concepts in age-related hearing loss: epidemiology and mechanistic pathways. *Hear. Res.*  
 1403 303, 30–38. doi:10.1016/j.heares.2013.01.021.

1404 Zan, P., Presacco, A., Anderson, S., and Simon, J. Z. (2020). Exaggerated cortical representation  
 1405 of speech in older listeners: mutual information analysis. *J. Neurophysiol.* 124, 1152–1164.  
 1406 doi:10.1152/jn.00002.2020.

1407 Zhao, F., and Stephens, D. (2007). A critical review of king-kopetzky syndrome: hearing  
 1408 difficulties, but normal hearing? *Audiol. Med.* 5, 119–124.  
 1409 doi:10.1080/16513860701296421.

1410

1411

1412 **Tables**

1413

1414 Table 1. Mixed-factors ANOVA results. Significant F-statistic values are bold, with levels of  
 1415 significance: \* p < 0.05, \*\* p < 0.01, \*\*\* p < 0.001

1416

|           | df    | F              | $\eta_p^2$ |
|-----------|-------|----------------|------------|
| Attention | 1, 37 | <b>34.3***</b> | 0.48       |
| Feature   | 2, 74 | <b>18.5***</b> | 0.33       |
| ROI       | 1, 37 | <b>8.9**</b>   | 0.19       |

## Aging Effects on Speech Tracking

|                                 |           |               |      |
|---------------------------------|-----------|---------------|------|
| Age                             | 1, 37     | <b>7.92**</b> | 0.18 |
| Attention × Age                 | 1, 37     | <b>7.6**</b>  | 0.17 |
| Feature × Age                   | 2, 74     | <b>4.1*</b>   | 0.10 |
| ROI × Age                       | 1, 37     | <b>7.2*</b>   | 0.16 |
| Attention × Feature             | 1.8, 66.6 | <b>8.5**</b>  | 0.19 |
| Attention × ROI                 | 1, 37     | 2             | 0.05 |
| Feature × ROI                   | 1.7, 62.2 | 3.2           | 0.08 |
| Attention × Feature × Age       | 2, 74     | 2             | 0.05 |
| Attention × ROI × Age           | 1, 37     | 1.6           | 0.04 |
| Feature × ROI × Age             | 2, 74     | 0.7           | 0.02 |
| Attention × Feature × ROI       | 2, 74     | <b>9.7***</b> | 0.21 |
| Attention × Feature × ROI × Age | 2, 74     | 2.4           | 0.06 |

1417

1418
